# Supplementary material for: SMARCD3 is a potential prognostic marker and therapeutic target in CAFs
Source: publisher site journal article supplement (doi:10.18632/aging.104102), 2020-10-28
Supplement: Supplementary file [file aging-v12i20-104102-supplementary-material-SD1.pdf]

## SUPPLEMENTARY FIGURES

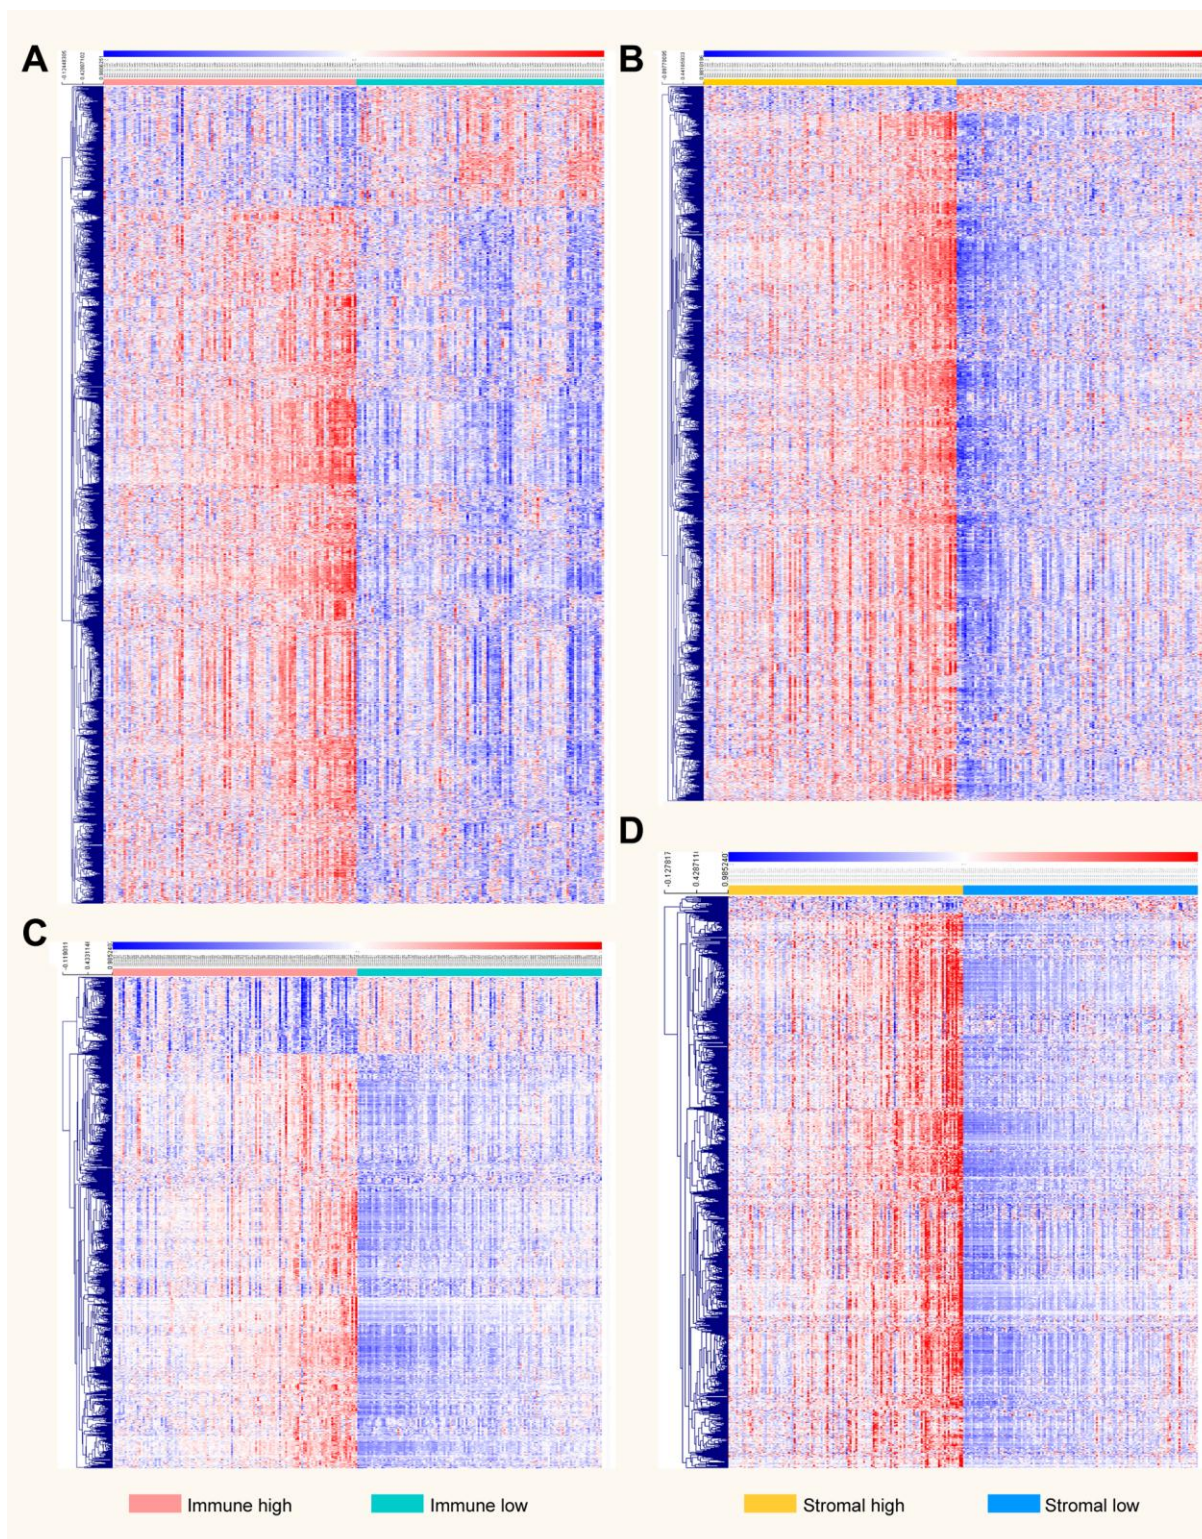

**Supplementary Figure 1. Heat map of TME related genes.** DEGs computed based on immune (A) or stromal score (B) using HNSC Agilent microarray data. DEGs computed based on immune (C) or stromal score (D) using HNSC RNAseq data.

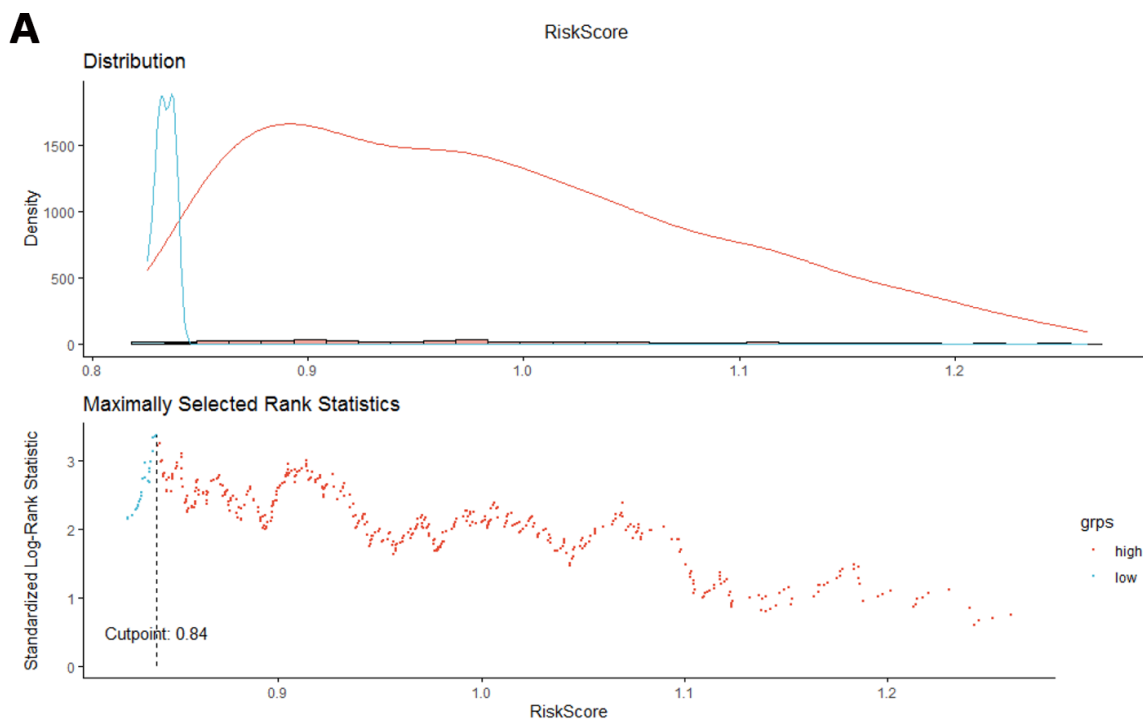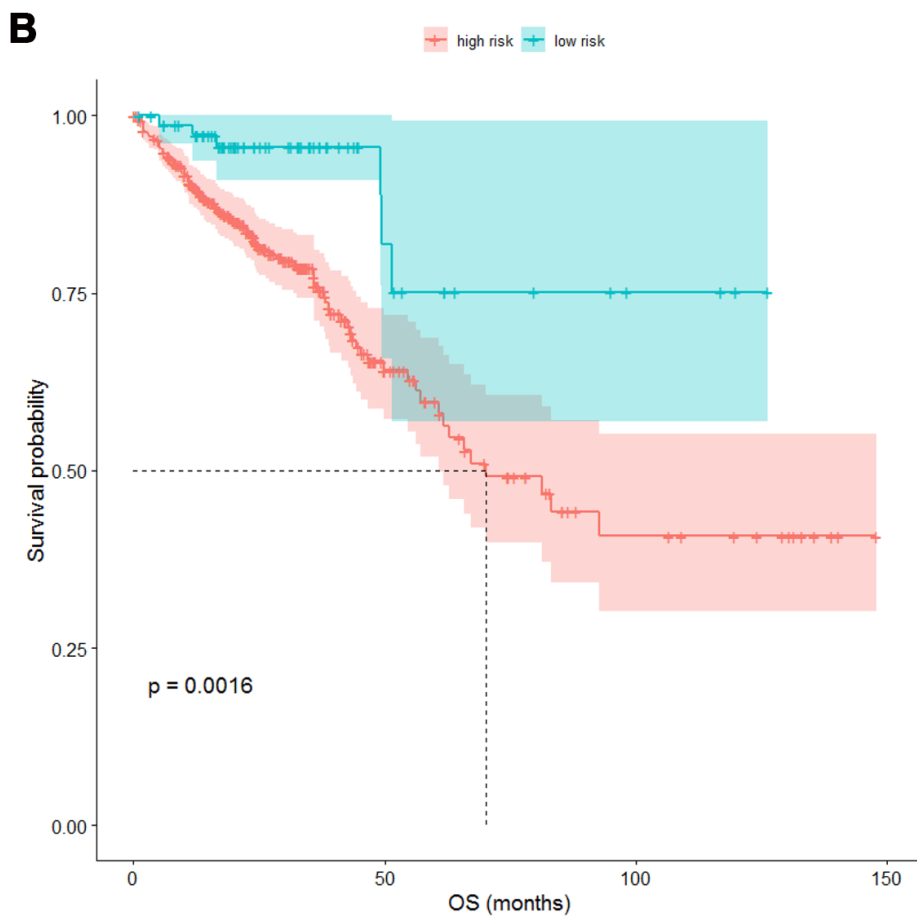

**Supplementary Figure 2.** (A) Upper graph: the distribution of risk scores; lower graph: cutoff point selection based on log rank statistics. (B) Kaplan-Meier survival analysis of high risk and low risk groups.

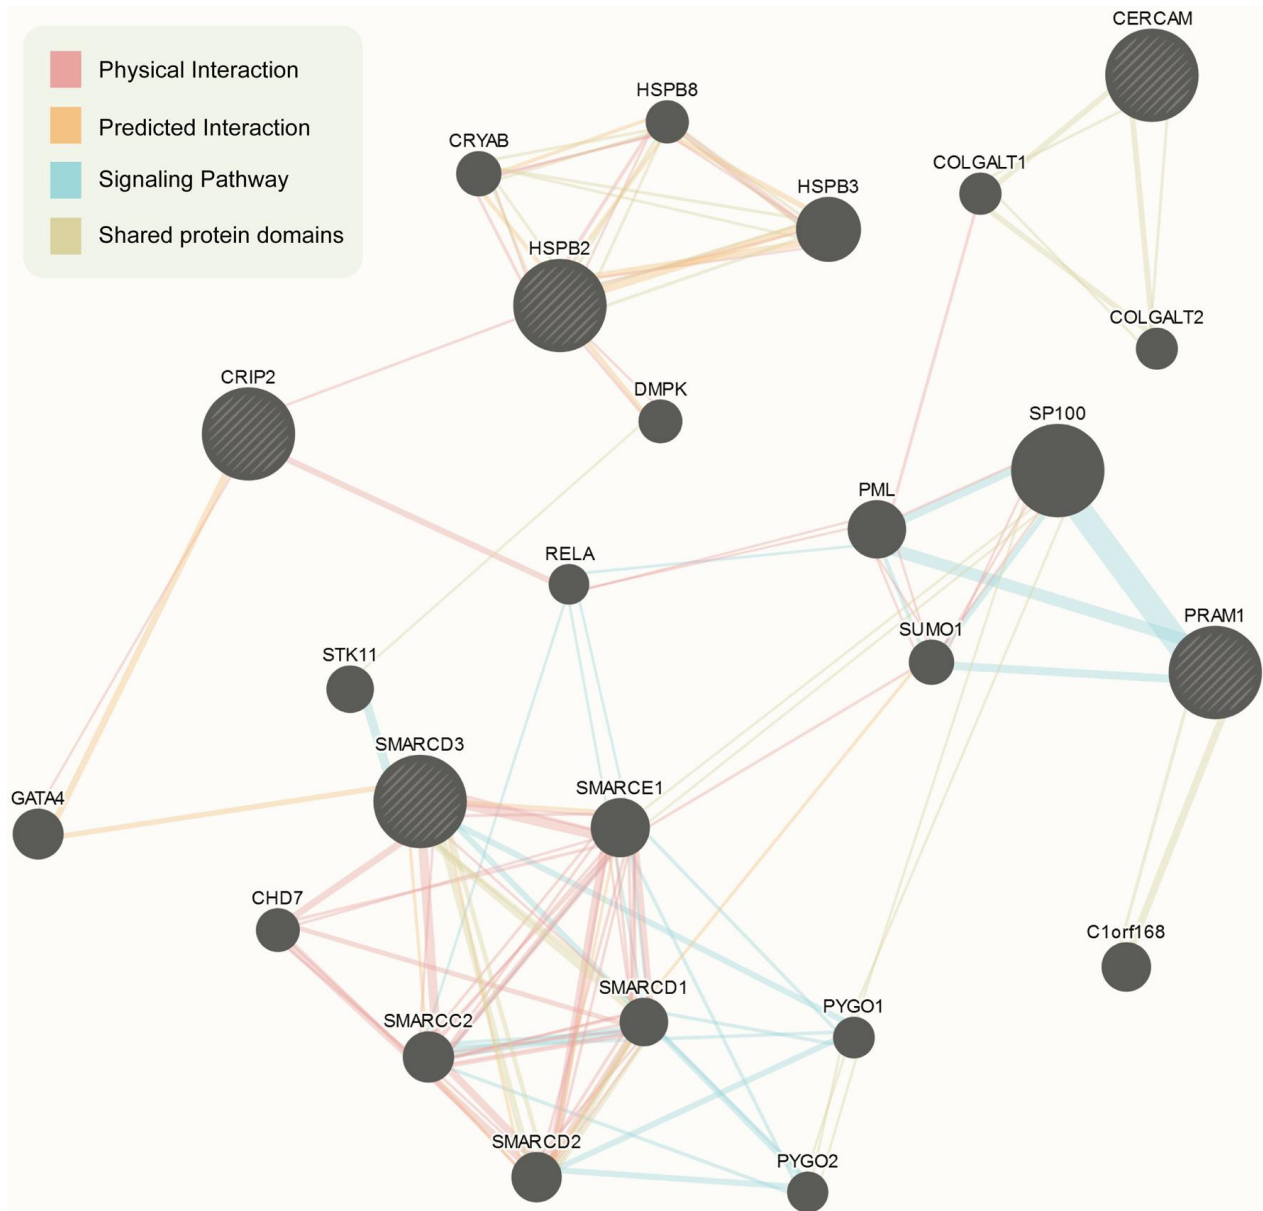

**Supplementary Figure 3. Protein-Protein interaction network of SMARCD3, CRIP2, PRAM1, HSPB2 and CERCAM.**



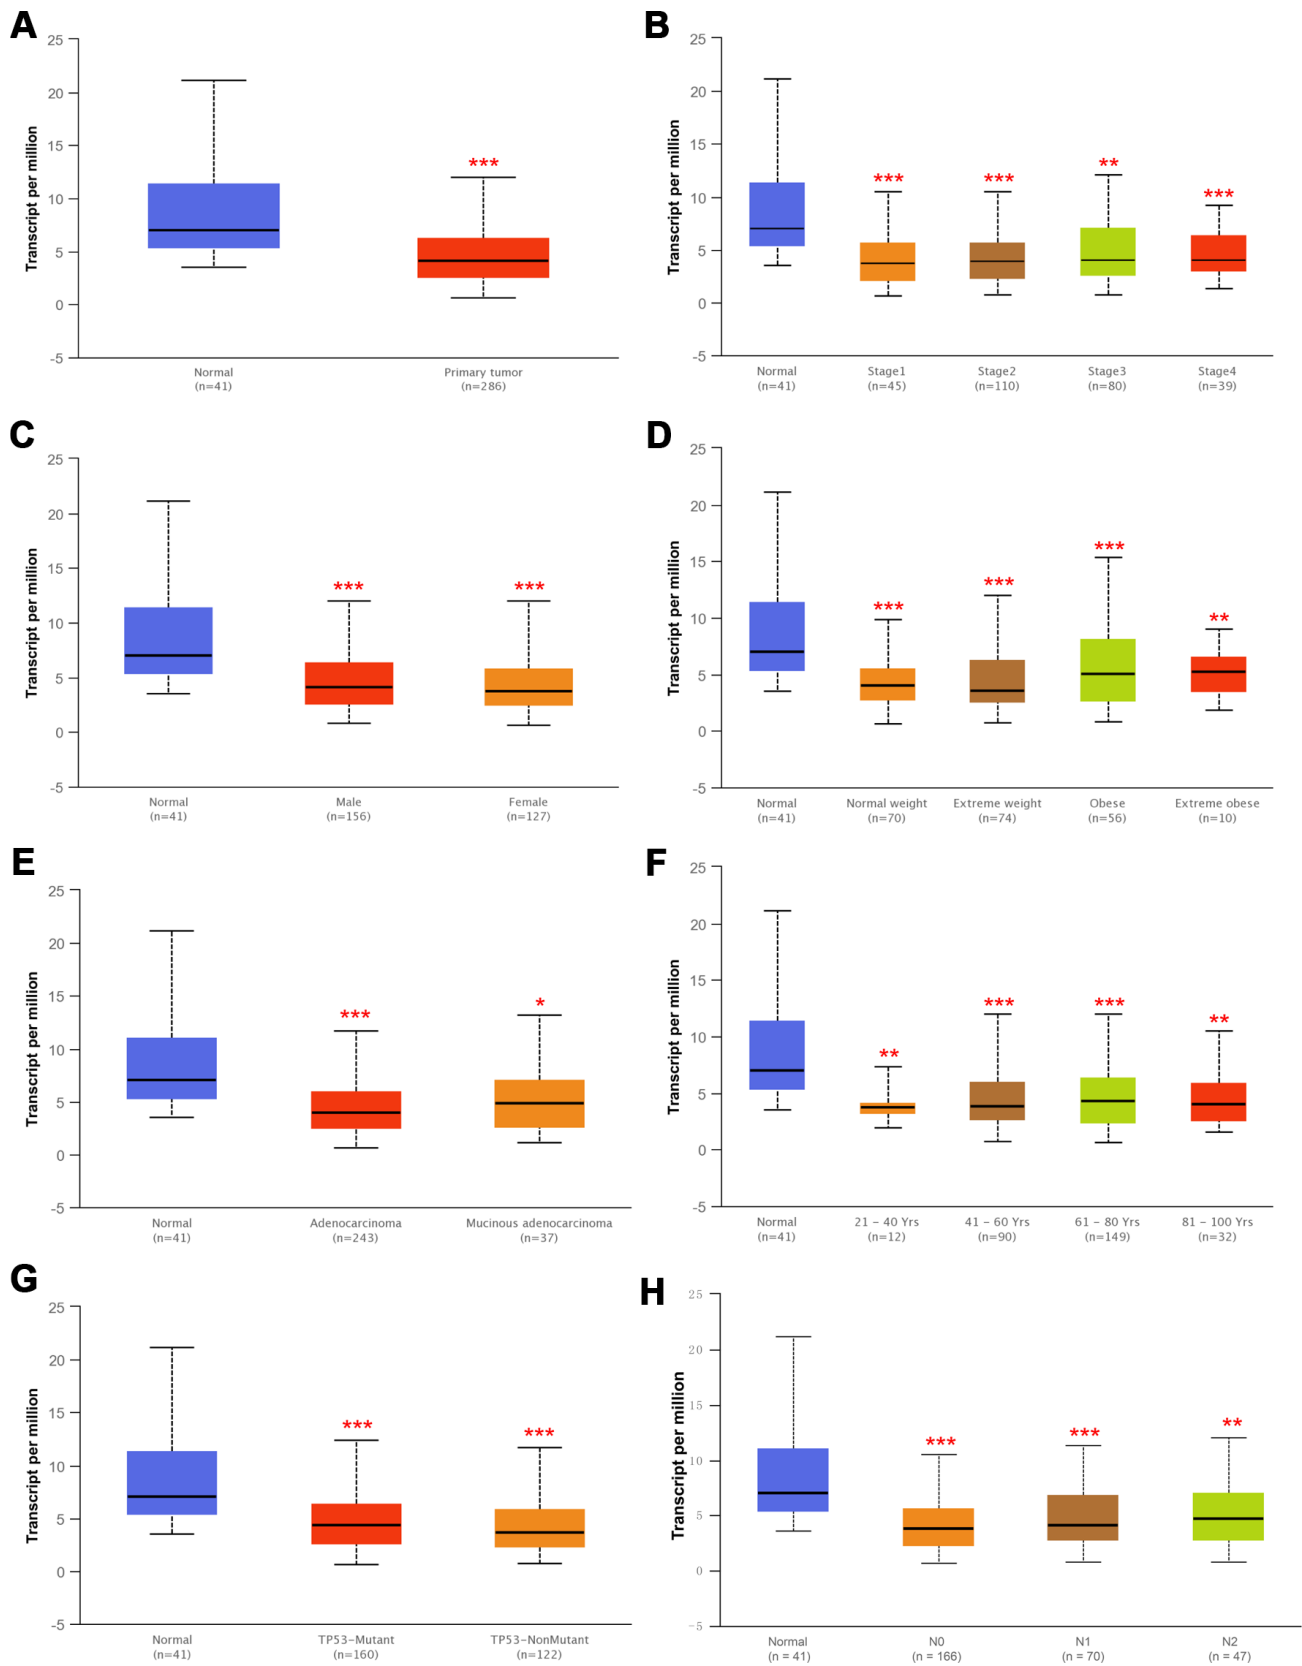

**Supplementary Figure 4. SMARCD3 expression in different clinical subgroups. (A)** SMARCD3 expression in colon cancer and normal controls. SMARCD3 expression in different cancer stage **(B)**, gender **(C)**, body weight **(D)**, sample type **(E)**, age **(F)**, TP53 mutation status **(G)** and nodal metastasis status **(H)**.

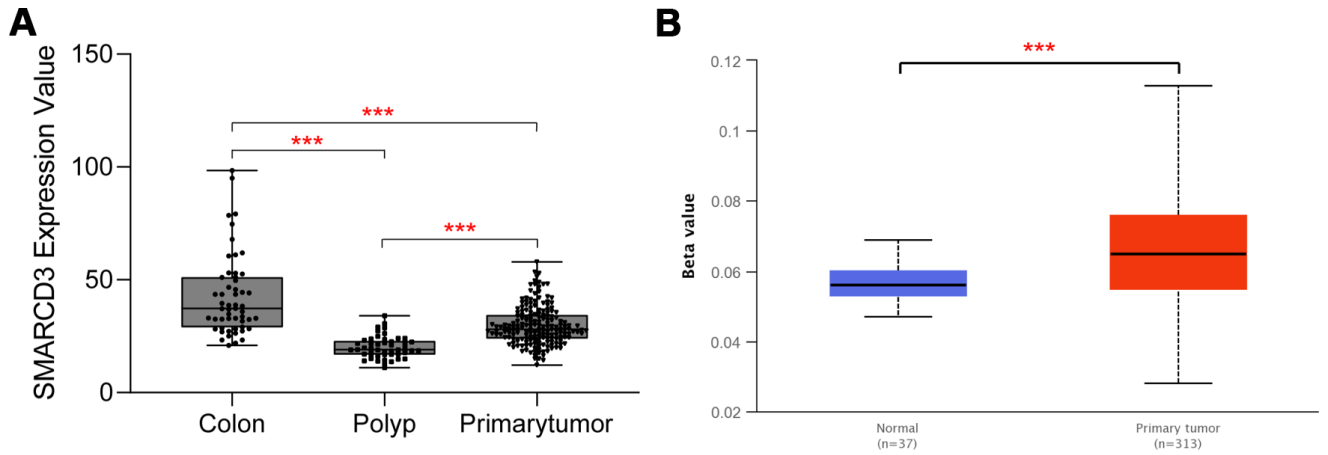

**Supplementary Figure 5.** (A) SMARCD3 expression in normal control, polyps and primary tumor. (B) the methylation level of SMARCD3 in primary tumor is significantly higher than normal control.

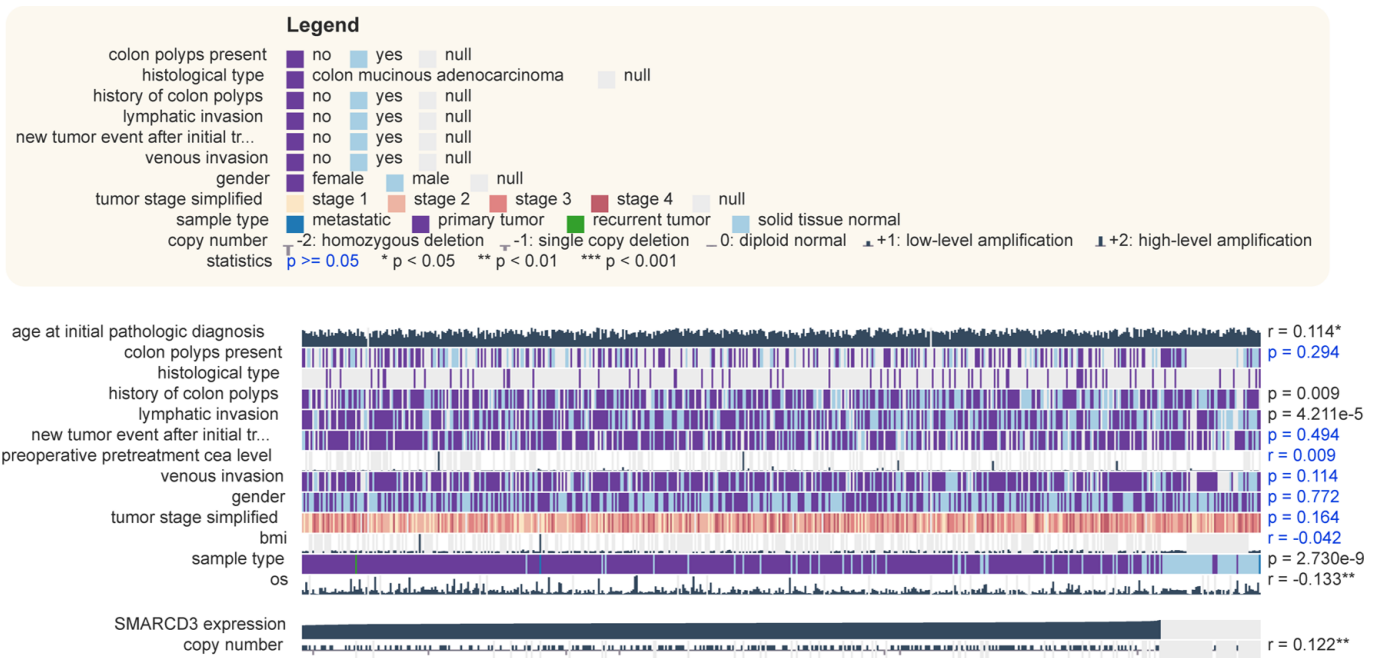

**Supplementary Figure 6.** Association between SMARCD3 expression levels and clinical features.

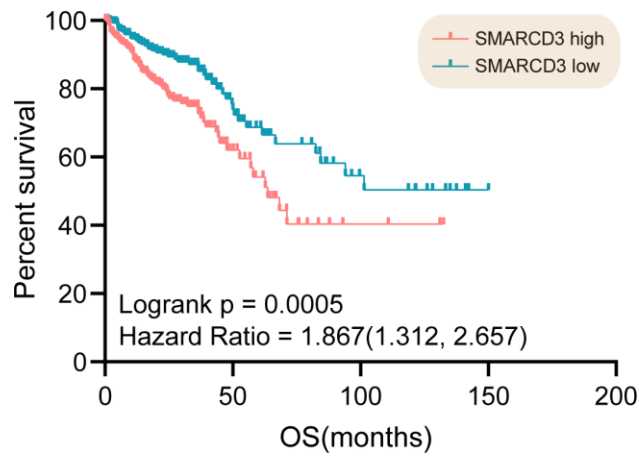

Supplementary Figure 7. Kaplan-Meier survival analysis based on SMARCD3 expression values using TCGA COAD RNAseq data (N = 592).

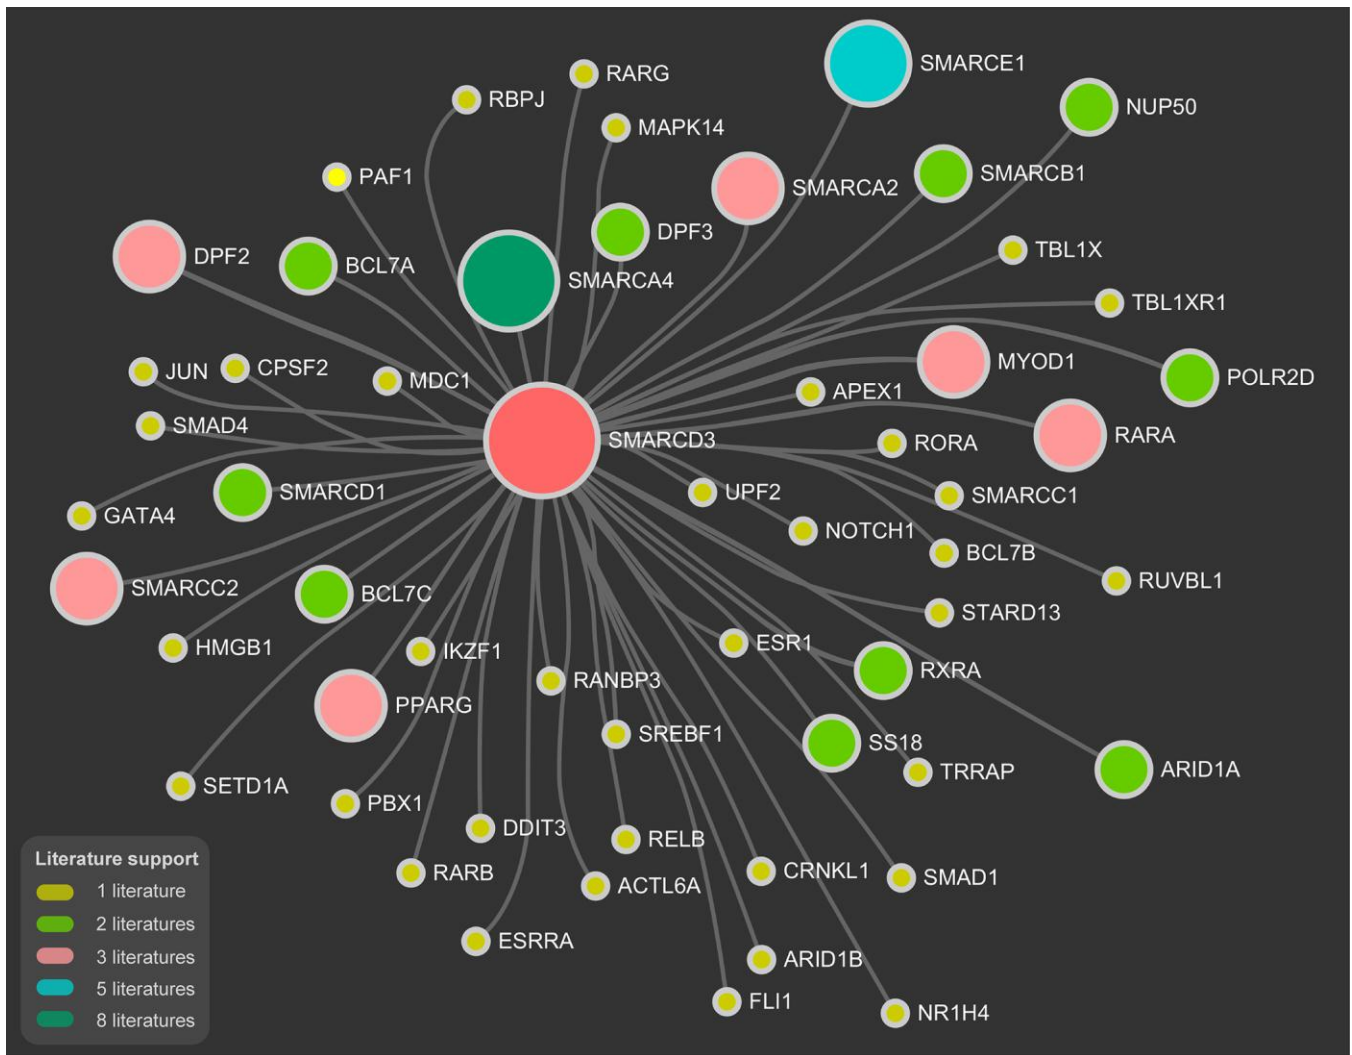

Supplementary Figure 8. Protein-Protein interaction network of SMARCD3 based on data from CTDbase.

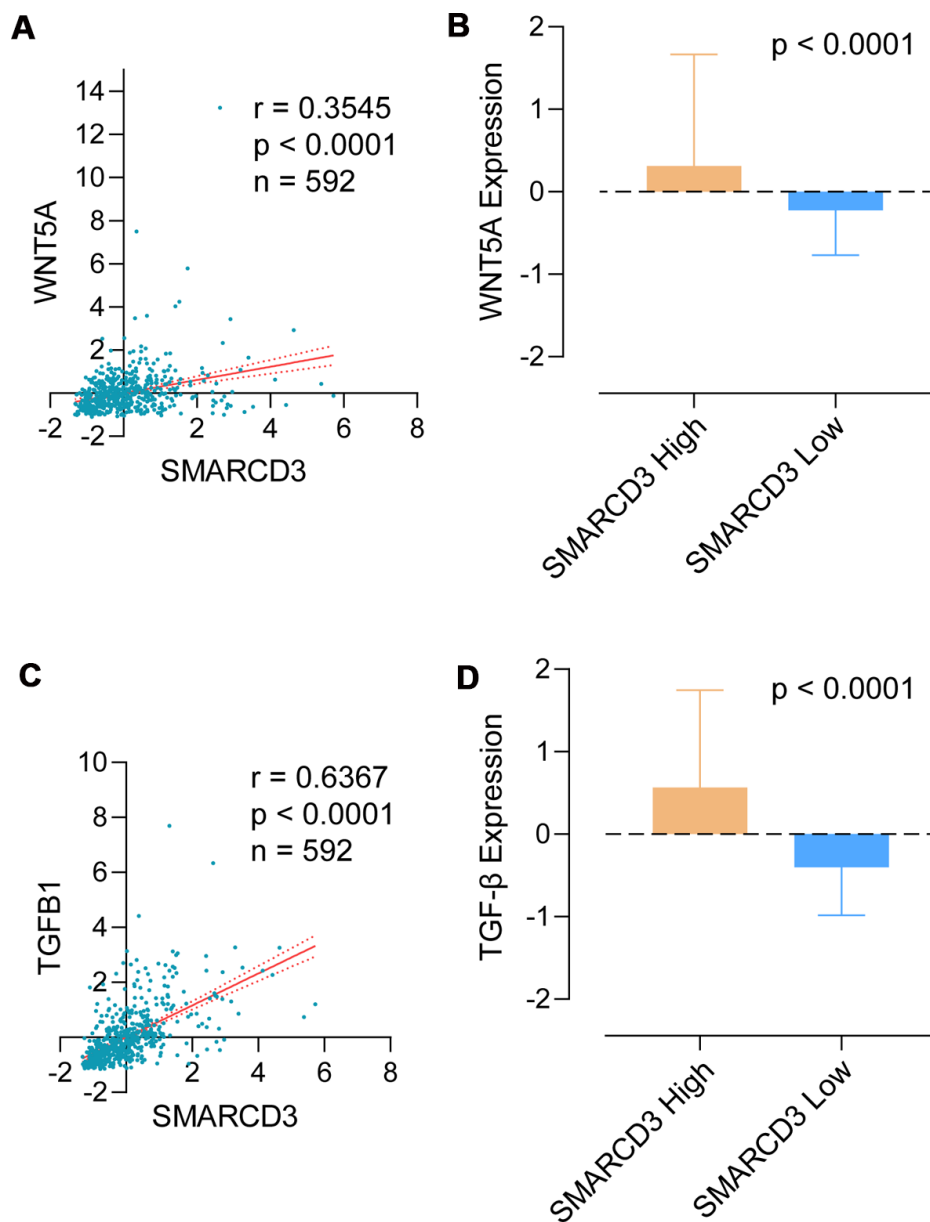

**Supplementary Figure 9. SMARCD3 expression is positively correlated with WNT5A and TGF- $\beta$ .** (A) Correlation plot of WNT5A and SMARCD3. (B) WNT5A mRNA expression in SMARCD3 high and low groups. (C) Correlation plot of TGFB1 and SMARCD3. (D) TGF $\beta$  mRNA expression in SMARCD3 high and low groups.

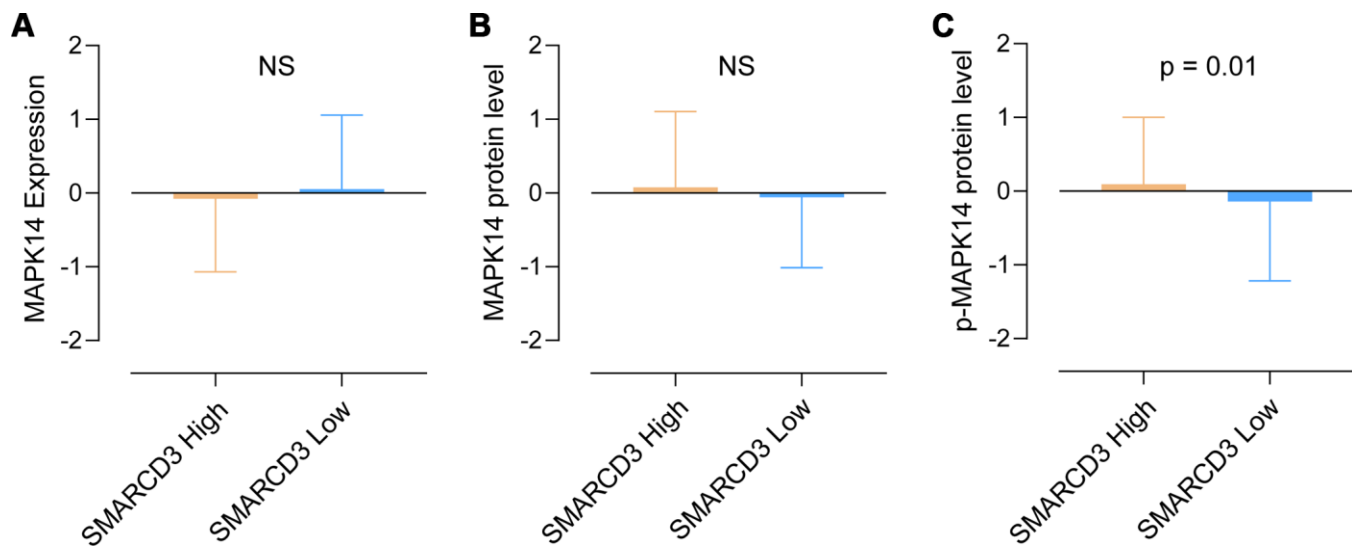

**Supplementary Figure 10. SMARCD3 expression is positively correlated with MAPK14 phosphorylation levels.** MAPK14 mRNA (A), MAPK14 protein (B) and p-MAPK14 protein (C) expression levels in SMARCD3 high and low groups.
