# Supplementary material for: SMARCD3 is a potential prognostic marker and therapeutic target in CAFs
Source: Aging (Albany NY). 2020 Oct 28;12(20):20835–61. doi: 10.18632/aging.104102 (PMC7655158; doi:10.18632/aging.104102)
Supplement: Supplementary Table 1 [file aging-12-104102-s002..xlsx]

## Sheet: Supplementary Table 1
Supplementary Table 1. List of 372 commonly upregulated genes in TME.
SMARCD3
LILRB2
SLC2A5
SOD2
FGR
AQP9
CXCL13
PCOLCE
CSF3R
SERPINF1
HCST
C5AR1
PIK3R5
SLCO2B1
SIGLEC9
TLR1
ZMYND15
PRR16
CLEC4E
PLEKHO1
TNFRSF9
LAIR1
EVI2A
GIMAP1
APOE
GYPC
ST8SIA4
SERPING1
SAMSN1
FCN1
FYB
RHOH
HVCN1
GMFG
PIK3AP1
DPYD
SDC2
MAN2B1
CD53
CD300A
UBE2L6
TPBG
ARHGAP15
GNB4
IL18BP
TNFSF12
HK3
GPR132
PRRX1
BTK
HCK
TFEC
TNFAIP6
RASSF4
CTSB
TNF
SLA
LIMD2
THY1
KANK3
SPP1
SECTM1
GLIPR2
FAM49A
EHD2
NCF1
CD2
IL21R
FAM78A
FCGR3A
CD83
IL4I1
CTSK
SIGLEC1
MSR1
KLRG1
PLEKHO2
LST1
CMKLR1
FLI1
SH2D3C
RAMP3
EPSTI1
GNG2
ITGB2
FOLR2
CD72
GIMAP6
TGFB1
SLC31A2
CHST2
PTGIR
SOCS3
TIMP1
CD86
SLC11A1
GBP4
LILRA5
MMP1
CPZ
ABI3
MMP12
PQLC3
CREM
PRRX2
CD68
BCL2A1
RGS1
CYTH4
IGSF21
SLC38A6
FPR1
FMNL1
CD14
PARVG
IFFO1
LUM
HMOX1
FCGR2A
CECR1
EBI3
MFSD7
CTNS
MFGE8
IL10
ACP5
HIC1
DKK3
ALOX5AP
SAMHD1
LILRB3
SPI1
TREM2
MS4A4A
CPXM1
WNT2
STAB1
CEACAM21
GIMAP4
CLEC7A
SELPLG
GBP1
CD74
DEGS1
EVI2B
DNAJC5B
NCKAP1L
EMP3
VAMP5
ADORA3
LILRA1
CRIP2
CYBB
PLA2G7
WISP1
P2RY10
VMO1
SLC15A3
RHOG
ITGAX
VASN
GPR84
IL1RN
MAFB
CLIP4
CD209
CXCL10
FECH
SLC7A7
LCP2
GAB3
IL10RA
ADAP2
CCL5
EMILIN2
SIGLEC5
CD84
CLEC5A
ATP10D
LCP1
DOK2
HAPLN3
MAF
MPEG1
FCGR1A
FPR2
LAP3
KMO
ICOS
IGSF6
WIPF1
PDCD1LG2
FCER1G
NFKBIA
TSPAN4
CLEC11A
C1QA
DCN
GPR68
TREM1
PMP22
TLR2
DHX58
IRF9
HSD17B14
HAVCR2
MAP7D1
TWIST1
LY96
GGT5
APOC1
SCARF1
EFS
HOPX
PTPRCAP
FGL2
CD300C
RAB42
C1QC
MSC
PRKCDBP
TXNDC15
NLRC4
CD4
FAM20A
FPR3
PRAM1
MSN
PLEK
NLRP3
RAB8B
GNAI2
GPNMB
CD33
GPR137B
BASP1
FCGR2B
PDLIM7
TMEM86A
MXRA8
LRRC8C
NFATC1
LGALS1
FLT3LG
LILRB4
CSF1
MGAT1
CLEC2B
C3AR1
NCF2
TLR6
RNASE2
LY86
PPAPDC3
KLHDC7B
IGFBP7
SNX10
RGS19
LITAF
LRRC25
MNDA
MS4A6A
NR3C1
THBD
NKG7
CD180
PPM1M
FES
TNFRSF4
TRPV2
COL6A2
LILRA2
HSPB2
KLHDC8B
STOM
CD248
CCR2
CNRIP1
CEACAM4
SIRPB1
TLR8
CD7
RAB33A
SPHK1
SLAMF8
STX11
LIPA
DRAM1
WAS
LAT2
VSIG4
SRGN
CAMK1G
CTSD
AIF1
CCL2
FAM26F
ITGA4
ITGAM
TPSAB1
PDPN
ENG
P2RY13
CD37
GPR65
IKBIP
OSCAR
UROD
CMTM2
LAYN
IL2RA
CCR1
PSAP
IFI6
GPR183
LILRB1
CD80
RARRES2
P2RY6
DOK3
CCL8
TNFSF13B
TBC1D10C
APOBEC3H
GPR34
SASH3
IFI30
CD52
EFEMP2
ICAM1
CXCL9
CLEC1A
KCNK13
C1QB
LYL1
SIGLEC10
CD48
SPON2
LILRB5
STAT2
PTAFR
DPEP2
TNFAIP2
NFKBIE
MYO1F
CD300LF
LAPTM5
MMP25
DDX58
MYO1G
GIMAP5
LILRA3
CLEC4A
LTC4S
COL6A1
CERCAM
CFP
ZNF385A
CLIC2
SIGLEC7
CCL3
CSF1R
KCNJ15
NAGK
CALHM2
PLXDC1
TNFAIP8L2
IL2RB
KLRD1
HLX
HCLS1
MMP9
