# Supplementary material for: SMARCD3 is a potential prognostic marker and therapeutic target in CAFs
Source: Aging (Albany NY). 2020 Oct 28;12(20):20835–61. doi: 10.18632/aging.104102 (PMC7655158; doi:10.18632/aging.104102)
Supplement: Supplementary Table 2 [file aging-12-104102-s001..xlsx]

## Sheet: Supplementary Table 2
Supplementary Table 2. GO analysis of 372 genes (Biological Process).
Pathway	Total	Expected	Hits	P.Value	FDR
Immune response	1430	30.2	118	4.87e-42	3.99e-39
Immune system process	2720	57.4	152	2.91e-35	1.19e-32
Defense response	1510	31.9	110	1.21e-33	3.31e-31
Regulation of immune system process	1190	25.2	92	2.26e-29	4.64e-27
Response to wounding	1310	27.8	93	6.75e-27	1.11e-24
Inflammatory response	569	12	60	1.04e-25	1.43e-23
Positive regulation of immune system process	739	15.6	67	6.3e-25	7.38e-23
Innate immune response	638	13.5	61	7.33e-24	7.23e-22
Regulation of immune response	727	15.4	65	7.94e-24	7.23e-22
Cell activation	960	20.3	74	3.01e-23	2.47e-21
Leukocyte activation	707	14.9	61	1.55e-21	1.16e-19
Immune effector process	576	12.2	54	1.03e-20	7.03e-19
Leukocyte migration	309	6.53	39	1.41e-19	8.92e-18
Cytokine production	576	12.2	49	4.47e-17	2.62e-15
Lymphocyte activation	601	12.7	49	2.49e-16	1.36e-14
Regulation of immune effector process	249	5.26	31	1.41e-15	7.23e-14
Regulation of cytokine production	513	10.8	43	7.89e-15	3.8e-13
Response to other organism	716	15.1	51	1.4e-14	6.2e-13
T cell activation	432	9.13	39	1.44e-14	6.2e-13
Response to stress	4150	87.7	150	2.11e-14	8.66e-13
Response to bacterium	385	8.14	36	5.56e-14	2.17e-12
Response to biotic stimulus	749	15.8	51	8.28e-14	3.09e-12
Regulation of lymphocyte activation	360	7.61	34	2.21e-13	7.86e-12
Cell migration	1050	22.3	59	3.31e-12	1.13e-10
Adaptive immune response based on somatic recombination of immune receptors built from immunoglobulin superfamily domains	218	4.61	25	5.69e-12	1.87e-10
Leukocyte chemotaxis	150	3.17	21	6.45e-12	2.04e-10
Regulation of T cell activation	279	5.9	28	7.64e-12	2.32e-10
Adaptive immune response	241	5.09	26	8.61e-12	2.52e-10
Positive regulation of cell migration	263	5.56	27	1.08e-11	3.07e-10
Positive regulation of immune response	487	10.3	37	1.33e-11	3.63e-10
Positive regulation of lymphocyte activation	250	5.28	26	1.99e-11	5.25e-10
Regulation of defense response	519	11	38	2.07e-11	5.31e-10
Leukocyte differentiation	404	8.54	33	2.73e-11	6.79e-10
Regulation of cell migration	456	9.64	35	3.75e-11	9.05e-10
Hemopoiesis	640	13.5	42	5.5e-11	1.29e-09
Hematopoietic or lymphoid organ development	679	14.4	43	9.87e-11	2.25e-09
Positive regulation of response to stimulus	1550	32.8	71	1.85e-10	4.1e-09
Immune system development	722	15.3	44	2.01e-10	4.33e-09
Regulation of response to external stimulus	461	9.74	34	2.13e-10	4.48e-09
T cell proliferation	147	3.11	19	2.74e-10	5.61e-09
Positive regulation of T cell activation	202	4.27	22	3.05e-10	6.1e-09
Cytokine secretion	110	2.33	16	1.25e-09	2.43e-08
Regulation of response to stimulus	3360	71	116	3.58e-09	6.74e-08
Cellular defense response	60	1.27	12	3.62e-09	6.74e-08
Positive regulation of defense response	273	5.77	24	3.75e-09	6.83e-08
Regulation of cytokine secretion	88	1.86	14	4.15e-09	7.4e-08
Regulation of T cell proliferation	120	2.54	16	4.58e-09	7.99e-08
Regulated secretory pathway	50	1.06	11	5.63e-09	9.61e-08
Response to external stimulus	1510	31.9	66	6.09e-09	1.02e-07
Protein secretion	196	4.14	20	6.25e-09	1.02e-07
Negative regulation of immune system process	207	4.38	20	1.6e-08	2.56e-07
Lymphocyte differentiation	260	5.5	22	3.42e-08	5.4e-07
Humoral immune response	157	3.32	17	3.65e-08	5.64e-07
Positive regulation of cytokine secretion	63	1.33	11	7.27e-08	1.1e-06
Positive regulation of protein secretion	94	1.99	13	8.44e-08	1.26e-06
Wound healing	700	14.8	38	8.65e-08	1.27e-06
Production of molecular mediator of immune response	130	2.75	15	1.01e-07	1.45e-06
Activation of immune response	399	8.43	27	1.02e-07	1.45e-06
Positive regulation of cytokine biosynthetic process	66	1.4	11	1.2e-07	1.67e-06
Defense response to bacterium	152	3.21	16	1.38e-07	1.88e-06
Hemostasis	570	12	33	1.52e-07	2.04e-06
Cytokine biosynthetic process	118	2.49	14	1.91e-07	2.52e-06
Cytokine metabolic process	121	2.56	14	2.61e-07	3.4e-06
Regulation of cytokine biosynthetic process	105	2.22	13	3.18e-07	4.07e-06
Blood coagulation	564	11.9	32	3.73e-07	4.71e-06
Regulation of protein secretion	145	3.06	15	4.27e-07	5.31e-06
Coagulation	568	12	32	4.36e-07	5.34e-06
Positive regulation of T cell proliferation	75	1.59	11	4.61e-07	5.56e-06
Positive regulation of transport	570	12	32	4.72e-07	5.6e-06
Phagocytosis	109	2.3	13	4.93e-07	5.78e-06
Negative regulation of multicellular organismal process	410	8.67	26	6.25e-07	7.22e-06
Regulation of cell proliferation	1430	30.2	58	7.59e-07	8.64e-06
B cell activation	194	4.1	17	7.85e-07	8.82e-06
Regulation of multicellular organismal process	2480	52.4	86	8.97e-07	9.92e-06
Homeostasis of number of cells	196	4.14	17	9.07e-07	9.92e-06
Positive regulation of cytokine production	268	5.66	20	1.09e-06	1.18e-05
Cytokine_mediated signaling pathway	374	7.91	24	1.39e-06	1.48e-05
Positive regulation of cell proliferation	786	16.6	38	1.56e-06	1.64e-05
Response to virus	325	6.87	22	1.62e-06	1.68e-05
Regulation of cell shape	106	2.24	12	2.39e-06	2.42e-05
Regulation of myeloid cell differentiation	145	3.06	14	2.39e-06	2.42e-05
Regulation of body fluid levels	680	14.4	34	2.8e-06	2.8e-05
Multi_organism process	1710	36.1	64	2.88e-06	2.84e-05
Defense response to virus	215	4.54	17	3.25e-06	3.17e-05
Myeloid leukocyte differentiation	153	3.23	14	4.51e-06	4.35e-05
Myeloid cell differentiation	296	6.26	20	5e-06	4.77e-05
Interleukin_2 production	47	0.993	8	5.58e-06	5.2e-05
Regulation of anatomical structure morphogenesis	702	14.8	34	5.59e-06	5.2e-05
Regulation of developmental process	1880	39.7	67	8.69e-06	8.01e-05
Exocytosis	309	6.53	20	9.49e-06	8.59e-05
Regulation of transport	1220	25.9	49	9.53e-06	8.59e-05
T cell differentiation	186	3.93	15	9.75e-06	8.69e-05
Cell proliferation	1900	40.2	67	1.35e-05	0.000119
Secretion by cell	831	17.6	37	1.41e-05	0.000123
Regulation of endocytosis	128	2.71	12	1.7e-05	0.000147
Positive regulation of multicellular organismal process	649	13.7	31	1.95e-05	0.000166
Regulation of cell morphogenesis	325	6.87	20	1.98e-05	0.000168
Detection of biotic stimulus	28	0.592	6	2.16e-05	0.000181
Negative regulation of transport	318	6.72	19	4.78e-05	0.000396
Second_messenger_mediated signaling	166	3.51	13	5.19e-05	0.000426
Positive regulation of secretion	246	5.2	16	7.04e-05	0.000566
I_kappaB kinase/NF_kappaB cascade	246	5.2	16	7.04e-05	0.000566
Calcium_mediated signaling	107	2.26	10	8.82e-05	0.000703
Secretion	947	20	38	0.000102	0.000807
Interaction with host	426	9	22	0.000108	0.000846
Cell_cell adhesion	461	9.74	23	0.000127	0.000979
Interferon_gamma production	91	1.92	9	0.000128	0.000984
Regulation of protein import into nucleus	137	2.9	11	0.000156	0.00119
Vesicle_mediated transport	1110	23.5	42	0.000159	0.00119
Positive regulation of cell differentiation	571	12.1	26	0.000201	0.0015
Regulation of secretion	517	10.9	24	0.000267	0.00197
Regulation of nucleocytoplasmic transport	172	3.64	12	0.000298	0.00218
B cell differentiation	82	1.73	8	0.000333	0.00242
Regulation of intracellular transport	290	6.13	16	0.00046	0.00331
Positive regulation of developmental process	817	17.3	32	0.000565	0.00403
Negative regulation of secretion	135	2.85	10	0.000589	0.00416
Positive regulation of NF_kappaB transcription factor activity	115	2.43	9	0.000741	0.00519
Regulation of angiogenesis	169	3.57	11	0.000941	0.00654
Positive regulation of sequence_specific DNA binding transcription factor activity	198	4.19	12	0.00105	0.0072
Negative regulation of cell proliferation	585	12.4	24	0.00151	0.0103
