# Supplementary material for: SMARCD3 is a potential prognostic marker and therapeutic target in CAFs
Source: Aging (Albany NY). 2020 Oct 28;12(20):20835–61. doi: 10.18632/aging.104102 (PMC7655158; doi:10.18632/aging.104102)
Supplement: Supplementary Table 6 [file aging-12-104102-s003..xlsx]

## Sheet: Supplementary Table 6
Supplementary Table 6. COAD specific Protein-Protein network analysis of 372 genes.
Id	Label	Degree	Betweenness	Expression
3676	ITGA4	402	831743	0
3383	ICAM1	153	201658	0
9021	SOCS3	77	217137	0
4332	MNDA	64	105489	0
4792	NFKBIA	63	126544	0
6696	SPP1	55	97593.6	0
2908	NR3C1	54	118728	0
348	APOE	53	92191.3	0
30008	EFEMP2	52	99840.9	0
920	CD4	51	64420.7	0
752	FMNL1	50	106173	0
9260	PDLIM7	47	122031	0
4794	NFKBIE	44	52979.8	0
3055	HCK	39	95073.5	0
7454	WAS	38	63985.4	0
2771	GNAI2	37	73930.4	0
695	BTK	34	57830.2	0
8676	STX11	32	72331.7	0
4478	MSN	31	101875	0
6688	SPI1	31	60491.7	0
7291	TWIST1	30	34541.9	0
351	APP	28	146282	0
3689	ITGB2	28	36825.2	0
6347	CCL2	28	31143	0
2040	STOM	27	75667.9	0
23586	DDX58	26	43988.1	0
3956	LGALS1	24	64000.2	0
84966	IGSF21	24	41073.4	0
25939	SAMHD1	23	39610.4	0
7456	WIPF1	23	39200.5	0
84106	PRAM1	22	46238.2	0
7040	TGFB1	22	41266.7	0
9246	UBE2L6	22	40672.8	0
4772	NFATC1	22	40498.5	0
6648	SOD2	22	38526.8	0
59345	GNB4	22	37472.8	0
51225	ABI3	21	42876.7	0
653361	NCF1	20	38827.1	0
79745	CLIP4	20	32762	0
6383	SDC2	19	30213.7	0
55577	NAGK	18	33301.5	0
3090	HIC1	18	29543.5	0
2242	FES	18	28682.8	0
712	C1QA	18	25593.9	0
1390	CREM	18	25532.4	0
7124	TNF	18	25525.5	0
10379	IRF9	18	24562.8	0
1956	EGFR	16	96162.1	0
6773	STAT2	16	32394.4	0
51177	PLEKHO1	16	29034.8	0
942	CD86	16	4838.29	0
1994	ELAVL1	15	106265	0
1508	CTSB	15	30817.7	0
3937	LCP2	15	28498.6	0
1509	CTSD	15	19912	0
1634	DCN	14	32945.7	0
10278	EFS	14	20162.7	0
7805	LAPTM5	14	18131.5	0
4688	NCF2	13	14751.5	0
51171	HSD17B14	12	16509.8	0
6604	SMARCD3	12	16470.7	0
64581	CLEC7A	12	15149	0
51762	RAB8B	12	10941.7	0
1436	CSF1R	12	10602.4	0
4094	MAF	12	9116.29	0
2335	FN1	11	34909.5	0
58484	NLRC4	11	18357.9	0
30846	EHD2	11	17383	0
9935	MAFB	11	11910	0
2313	FLI1	10	49585.2	0
6774	STAT3	10	46485.4	0
2212	FCGR2A	10	21170	0
1397	CRIP2	10	13714.4	0
9046	DOK2	10	13160.1	0
54331	GNG2	10	12725	0
3560	IL2RB	10	10793.4	0
7316	UBC	9	47996.8	0
5970	RELA	9	38080.1	0
26270	FBXO6	9	34595.7	0
60	ACTB	9	32639.5	0
713	C1QB	9	21382.7	0
867	CBL	9	21333	0
3162	HMOX1	9	18206.4	0
5660	PSAP	9	12802.8	0
10409	BASP1	9	12453.1	0
710	SERPING1	9	10208.8	0
3059	HCLS1	9	9726.48	0
5724	PTAFR	9	5056.19	0
4067	LYN	8	24622.7	0
4609	MYC	8	23523.2	0
7097	TLR2	8	19679.6	0
1291	COL6A1	8	17395.3	0
5376	PMP22	8	17096.7	0
6714	SRC	8	16832.6	0
55700	MAP7D1	8	14982.8	0
5295	PIK3R1	8	14234.6	0
9363	RAB33A	8	13491.5	0
929	CD14	8	10558.6	0
8560	DEGS1	8	10333.9	0
1441	CSF3R	8	9278.3	0
10044	SH2D3C	8	8678.74	0
9516	LITAF	8	8454.57	0
914	CD2	8	8453.94	0
79132	DHX58	8	7411.12	0
2353	FOS	7	18319.1	0
4481	MSR1	7	18158	0
6503	SLA	7	14452	0
4283	CXCL9	7	12265.2	0
3490	IGFBP7	7	12117	0
30835	CD209	7	10316.1	0
4318	MMP9	7	9610.38	0
7389	UROD	7	9095.26	0
3684	ITGAM	7	8763.39	0
5341	PLEK	7	7842.25	0
4066	LYL1	7	7819.44	0
79930	DOK3	7	7531.33	0
5739	PTGIR	7	7354.16	0
2235	FECH	7	5917.22	0
2022	ENG	7	5391.5	0
7293	TNFRSF4	7	3732.09	0
2268	FGR	7	3508.91	0
3725	JUN	6	26053.3	0
3326	HSP90AB1	6	24149.5	0
3178	HNRNPA1	6	23467.8	0
4223	MEOX2	6	22914.8	0
142	PARP1	6	22837.5	0
3320	HSP90AA1	6	17919.4	0
975	CD81	6	15038.7	0
55803	ADAP2	6	14975.6	0
6850	SYK	6	12076.4	0
10287	RGS19	6	11419.4	0
2534	FYN	6	10873.5	0
51296	SLC15A3	6	10554.1	0
27128	CYTH4	6	10100	0
5996	RGS1	6	9689.1	0
924	CD7	6	7283.1	0
1435	CSF1	6	6045.7	0
64098	PARVG	6	5860.43	0
963	CD53	6	5701.42	0
64092	SAMSN1	6	5118.18	0
3604	TNFRSF9	6	3200.32	0
7189	TRAF6	5	37649.9	0
7157	TP53	5	24890.6	0
9759	HDAC4	5	22248.6	0
7329	UBE2I	5	20042.7	0
408	ARRB1	5	12695.4	0
114548	NLRP3	5	11492.3	0
56893	UBQLN4	5	10922.6	0
4869	NPM1	5	10893	0
7917	BAG6	5	10678.9	0
203068	TUBB	5	9055.02	0
10673	TNFSF13B	5	8082	0
23166	STAB1	5	8082	0
3065	HDAC1	5	7791.72	0
9531	BAG3	5	7569.66	0
7186	TRAF2	5	7477.48	0
3932	LCK	5	7425.43	0
8363	HIST1H4J	5	7258.5	0
8370	HIST2H4A	5	7258.5	0
55340	GIMAP5	5	6954.16	0
805	CALM2	5	6807.7	0
801	CALM1	5	6807.7	0
808	CALM3	5	6807.7	0
23327	NEDD4L	5	6147.75	0
84525	HOPX	5	6130.16	0
597	BCL2A1	5	6104.24	0
3716	JAK1	5	6040.09	0
25	ABL1	5	5877.9	0
2213	FCGR2B	5	4012.86	0
3815	KIT	5	3537.29	0
3559	IL2RA	5	3181.92	0
2885	GRB2	4	16320.8	0
3106	HLA-B	4	13620	0
27040	LAT	4	12982.4	0
2547	XRCC6	4	12032	0
7520	XRCC5	4	12032	0
2316	FLNA	4	11070.8	0
3837	KPNB1	4	9150.6	0
2130	EWSR1	4	9133.69	0
3688	ITGB1	4	8004.68	0
4691	NCL	4	7975.47	0
6188	RPS3	4	7677.56	0
10048	RANBP9	4	7258.12	0
335	APOA1	4	7181.3	0
5777	PTPN6	4	6873.57	0
10971	YWHAQ	4	6719.9	0
29979	UBQLN1	4	6242.17	0
399	RHOH	4	6063	0
7076	TIMP1	4	6063	0
391	RHOG	4	6063	0
10987	COPS5	4	5767.02	0
1654	DDX3X	4	5647.15	0
9636	ISG15	4	5631.8	0
341	APOC1	4	5484.87	0
4093	SMAD9	4	5470.44	0
1462	VCAN	4	5221.12	0
468	ATF4	4	5190.28	0
6840	SVIL	4	4968.43	0
8365	HIST1H4H	4	4867.23	0
8360	HIST1H4D	4	4867.23	0
121504	HIST4H4	4	4867.23	0
554313	HIST2H4B	4	4867.23	0
8366	HIST1H4B	4	4867.23	0
6925	TCF4	4	4790.31	0
2549	GAB1	4	4648.33	0
22797	TFEC	4	4227.68	0
971	CD72	4	4196.49	0
54	ACP5	4	4128.61	0
10482	NXF1	4	3873.79	0
9618	TRAF4	4	3742.13	0
7534	YWHAZ	4	3351.93	0
152007	GLIPR2	4	3249.27	0
51334	PRR16	4	2730.45	0
998	CDC42	4	2556.53	0
2770	GNAI1	4	2532.79	0
5781	PTPN11	4	2524.9	0
4790	NFKB1	4	2481.11	0
51056	LAP3	4	2352.68	0
8061	FOSL1	4	2234.55	0
3586	IL10	4	1590.43	0
7412	VCAM1	4	1274.88	0
6464	SHC1	4	734.15	0
714	C1QC	4	563.13	0
8359	HIST1H4A	4	522.8	0
8367	HIST1H4E	4	522.8	0
8368	HIST1H4L	4	522.8	0
8294	HIST1H4I	4	522.8	0
7408	VASP	3	42052	0
6477	SIAH1	3	39517.8	0
6386	SDCBP	3	23803	0
5597	MAPK6	3	14720.7	0
3198	HOXA1	3	13027.9	0
8668	EIF3I	3	12243.9	0
4653	MYOC	3	12110	0
988	CDC5L	3	12107	0
3315	HSPB1	3	11592.7	0
26986	PABPC1	3	11336.4	0
8661	EIF3A	3	11336.4	0
5966	REL	3	10997.4	0
4841	NONO	3	10553.6	0
613	BCR	3	10444.4	0
3184	HNRNPD	3	10109.8	0
7205	TRIP6	3	9912.89	0
2317	FLNB	3	9748.32	0
71	ACTG1	3	9026.65	0
163183	C19orf46	3	8762.78	0
2475	MTOR	3	8624.15	0
5359	PLSCR1	3	8467.03	0
10288	LILRB2	3	8430.05	0
2776	GNAQ	3	8421.79	0
6189	RPS3A	3	8116.92	0
8944	SNORD73A	3	8116.92	0
7022	TFAP2C	3	8079	0
374403	TBC1D10C	3	8079	0
595098	SNORD18A	3	8065.94	0
6124	RPL4	3	8065.94	0
595099	SNORD18B	3	8065.94	0
595097	SNORD16	3	8065.94	0
595100	SNORD18C	3	8065.94	0
6780	STAU1	3	7904.62	0
3014	H2AFX	3	6990.95	0
7428	VHL	3	6921.51	0
506	ATP5B	3	6853.94	0
3646	EIF3E	3	6688.53	0
4193	MDM2	3	6590.08	0
25913	POT1	3	6560.95	0
4088	SMAD3	3	6452.53	0
1387	CREBBP	3	6308	0
79001	VKORC1	3	6295.89	0
1822	ATN1	3	6295.36	0
8826	IQGAP1	3	6255.37	0
5747	PTK2	3	6190.22	0
6597	SMARCA4	3	5910.41	0
26815	SNORD36A	3	5890.76	0
26820	SNORD24	3	5890.76	0
26814	SNORD36B	3	5890.76	0
6130	RPL7A	3	5890.76	0
5252	PHF1	3	5875.61	0
7852	CXCR4	3	5789.79	0
57120	GOPC	3	5434.79	0
29887	SNX10	3	5257.33	0
81	ACTN4	3	5148.98	0
6135	RPL11	3	5148.98	0
6749	SSRP1	3	5104.63	0
5501	PPP1CC	3	5011.49	0
4791	NFKB2	3	4905.27	0
29760	BLNK	3	4665.35	0
4172	MCM3	3	4632.35	0
4176	MCM7	3	4632.35	0
2521	FUS	3	4425.29	0
10018	BCL2L11	3	4119.45	0
9693	RAPGEF2	3	4103.52	0
2214	FCGR3A	3	4099.54	0
728	C5AR1	3	4043	0
1292	COL6A2	3	4043	0
2995	GYPC	3	4043	0
11025	LILRB3	3	4043	0
2123	EVI2A	3	4043	0
121457	IKBIP	3	4043	0
3557	IL1RN	3	4043	0
4818	NKG7	3	4043	0
1318	SLC31A2	3	4043	0
55843	ARHGAP15	3	4043	0
50618	ITSN2	3	4042	0
2033	EP300	3	3803.39	0
213	ALB	3	3783.56	0
6404	SELPLG	3	3774.58	0
7431	VIM	3	3720.31	0
8945	BTRC	3	3710.99	0
6772	STAT1	3	3500.82	0
1213	CLTC	3	3426.61	0
3192	HNRNPU	3	3411.4	0
8522	GAS7	3	3319.97	0
5579	PRKCB	3	3265.76	0
4188	MDFI	3	3188.4	0
8742	TNFSF12	3	3018.58	0
6137	RPL13	3	2994.52	0
85388	SNORD14B	3	2994.52	0
606500	SNORD68	3	2994.52	0
27335	EIF3K	3	2994.52	0
6207	RPS13	3	2994.52	0
100508408	LOC100508408	3	2994.52	0
6083	SNORD21	3	2994.52	0
6125	RPL5	3	2994.52	0
10980	COPS6	3	2915.12	0
55660	PRPF40A	3	2735.4	0
3678	ITGA5	3	2702.47	0
7430	EZR	3	2697.73	0
7187	TRAF3	3	2595.97	0
1050	CEBPA	3	2549.76	0
5552	SRGN	3	2527.95	0
1788	DNMT3A	3	2488.71	0
1193	CLIC2	3	2486.04	0
7013	TERF1	3	2483.78	0
6045	RNF2	3	2480.47	0
4125	MAN2B1	3	2457.62	0
1513	CTSK	3	2455.64	0
51148	CERCAM	3	2453.76	0
9242	MSC	3	2422.31	0
120892	LRRK2	3	2372.66	0
6449	SGTA	3	2307.35	0
4904	YBX1	3	2296.7	0
87	ACTN1	3	2280.21	0
10148	EBI3	3	2198.4	0
10399	GNB2L1	3	2195.61	0
619570	SNORD95	3	2195.61	0
619571	SNORD96A	3	2195.61	0
4542	MYO1F	3	2147	0
2597	GAPDH	3	2070.35	0
6310	ATXN1	3	1999.41	0
154	ADRB2	3	1935.92	0
5371	PML	3	1786.08	0
6175	RPLP0	3	1591.87	0
8662	EIF3B	3	1591.87	0
3187	HNRNPH1	3	1591.87	0
6146	RPL22	3	1591.87	0
4851	NOTCH1	3	1553.71	0
8651	SOCS1	3	1478.75	0
11030	RBPMS	3	1397.85	0
4734	NEDD4	3	1396.02	0
4312	MMP1	3	1360.21	0
10657	KHDRBS1	3	1358.05	0
10152	ABI2	3	1285.84	0
5329	PLAUR	3	1270.15	0
57172	CAMK1G	3	1231.83	0
4233	MET	3	1226.16	0
857	CAV1	3	1207.9	0
2	A2M	3	1066.91	0
367	AR	3	1048.98	0
7106	TSPAN4	3	1038.52	0
7846	TUBA1A	3	856.84	0
30011	SH3KBP1	3	743.68	0
1796	DOK1	3	734.67	0
23521	RPL13A	3	659.7	0
26816	SNORD35A	3	659.7	0
26817	SNORD34	3	659.7	0
26818	SNORD33	3	659.7	0
26819	SNORD32A	3	659.7	0
6776	STAT5A	3	607.88	0
3071	NCKAP1L	3	570.54	0
4286	MITF	3	501.62	0
10326	SIRPB1	3	478.33	0
4689	NCF4	3	350.81	0
3101	HK3	3	216.17	0
7042	TGFB2	3	168.59	0
8362	HIST1H4K	3	85.06	0
8361	HIST1H4F	3	85.06	0
8364	HIST1H4C	3	85.06	0
10539	GLRX3	2	24615.1	0
5050	PAFAH1B3	2	24502	0
4621	MYH3	2	19253.3	0
1173	AP2M1	2	17495.5	0
8724	SNX3	2	15680.6	0
10726	NUDC	2	15507.6	0
5682	PSMA1	2	11516.4	0
5705	PSMC5	2	11348.8	0
3959	LGALS3BP	2	8688.38	0
9844	ELMO1	2	8076	0
55791	LRIF1	2	8076	0
5708	PSMD2	2	7701.91	0
50809	HP1BP3	2	6700.43	0
10642	IGF2BP1	2	6700.43	0
9188	DDX21	2	6700.43	0
26156	RSL1D1	2	6700.43	0
8761	PABPC4	2	6700.43	0
147872	CCDC155	2	6270.3	0
3135	HLA-G	2	6060	0
5621	PRNP	2	6060	0
3866	KRT15	2	6060	0
2923	PDIA3	2	6060	0
2120	ETV6	2	6032.23	0
3304	HSPA1B	2	5936.71	0
3303	HSPA1A	2	5936.71	0
7266	DNAJC7	2	5936.71	0
3146	HMGB1	2	5936.71	0
4666	NACA	2	5513.7	0
5093	PCBP1	2	5511.6	0
7535	ZAP70	2	5284.74	0
638	BIK	2	5256.03	0
10096	ACTR3	2	5134.87	0
862	RUNX1T1	2	5076.76	0
2322	FLT3	2	4776.63	0
4846	NOS3	2	4683.49	0
6224	RPS20	2	4404.26	0
26795	SNORD54	2	4404.26	0
7265	TTC1	2	4341.69	0
8743	TNFSF10	2	4148.19	0
11051	NUDT21	2	4131.69	0
27316	RBMX	2	4091.59	0
26787	SNORD61	2	4091.59	0
4604	MYBPC1	2	4083.76	0
2261	FGFR3	2	4047.2	0
7314	UBB	2	4042	0
3821	KLRC1	2	4042	0
3846	KRTAP5-9	2	4042	0
5199	CFP	2	4042	0
57532	NUFIP2	2	3789.57	0
6605	SMARCE1	2	3542.27	0
2690	GHR	2	3489.92	0
55072	RNF31	2	3430.35	0
63898	SH2D4A	2	3429.96	0
9457	FHL5	2	3422.12	0
3164	NR4A1	2	3354.61	0
5062	PAK2	2	3263.47	0
5087	PBX1	2	3233.01	0
7041	TGFB1I1	2	3228.2	0
10155	TRIM28	2	3219.89	0
7311	UBA52	2	3171.12	0
8726	EED	2	3112.51	0
22954	TRIM32	2	3098.05	0
6915	TBXA2R	2	3083.89	0
5591	PRKDC	2	3061.23	0
2193	FARSA	2	3050.47	0
2023	ENO1	2	3001.64	0
29110	TBK1	2	2941.98	0
7072	TIA1	2	2907.04	0
10915	TCERG1	2	2907.04	0
5216	PFN1	2	2907.04	0
5339	PLEC	2	2907.04	0
9611	NCOR1	2	2877.58	0
3309	HSPA5	2	2868.34	0
8576	STK16	2	2839.28	0
8841	HDAC3	2	2789.38	0
7529	YWHAB	2	2748.64	0
5987	TRIM27	2	2737.53	0
6279	S100A8	2	2655.88	0
10636	RGS14	2	2595.87	0
5580	PRKCD	2	2545.4	0
207	AKT1	2	2395.52	0
6607	SMN2	2	2386.94	0
6606	SMN1	2	2386.94	0
23764	MAFF	2	2351.92	0
6134	RPL10	2	2343.71	0
26778	SNORA70	2	2343.71	0
5515	PPP2CA	2	2290.1	0
11167	FSTL1	2	2239.67	0
1642	DDB1	2	2234.72	0
57506	MAVS	2	2214.03	0
525	ATP6V1B1	2	2185.89	0
523	ATP6V1A	2	2185.89	0
9349	RPL23	2	2151.98	0
619505	SNORA21	2	2151.98	0
292	SLC25A5	2	2151.98	0
1452	CSNK1A1	2	2151.98	0
1540	CYLD	2	2134.68	0
9632	SEC24C	2	2096.7	0
10813	UTP14A	2	2063.35	0
1936	EEF1D	2	2022	0
23643	LY96	2	2022	0
9112	MTA1	2	2022	0
6737	TRIM21	2	2022	0
2006	ELN	2	2022	0
2099	ESR1	2	2022	0
4060	LUM	2	2022	0
1108	CHD4	2	2022	0
718	C3	2	2022	0
3824	KLRD1	2	2022	0
10268	RAMP3	2	2022	0
9450	LY86	2	2022	0
2833	CXCR3	2	2022	0
5176	SERPINF1	2	2022	0
11326	VSIG4	2	2022	0
3936	LCP1	2	2022	0
25946	ZNF385A	2	2022	0
2643	GCH1	2	2022	0
1191	CLU	2	2022	0
5687	PSMA6	2	2022	0
55332	DRAM1	2	2022	0
1192	CLIC1	2	2022	0
1806	DPYD	2	2022	0
6355	CCL8	2	2022	0
8454	CUL1	2	2022	0
10457	GPNMB	2	2022	0
10859	LILRB1	2	2022	0
23484	LEPROTL1	2	2022	0
84034	EMILIN2	2	2022	0
1959	EGR2	2	1993.42	0
8935	SKAP2	2	1944.32	0
3039	HBA1	2	1892.38	0
1915	EEF1A1	2	1892.38	0
3040	HBA2	2	1892.38	0
30012	TLX3	2	1864.73	0
1457	CSNK2A1	2	1822.59	0
283106	CSNK2A1P	2	1822.59	0
6472	SHMT2	2	1809.66	0
8328	GFI1B	2	1768.68	0
55644	OSGEP	2	1765.72	0
3376	IARS	2	1762.6	0
3312	HSPA8	2	1762.6	0
26057	ANKRD17	2	1762.6	0
85389	SNORD14C	2	1762.6	0
85390	SNORD14D	2	1762.6	0
10197	PSME3	2	1762.6	0
2058	EPRS	2	1762.6	0
790	CAD	2	1762.6	0
7415	VCP	2	1762.6	0
10783	NEK6	2	1757.58	0
57154	SMURF1	2	1748.23	0
6601	SMARCC2	2	1747.04	0
11124	FAF1	2	1734.78	0
8214	DGCR6	2	1642.86	0
3206	HOXA10	2	1564.08	0
5829	PXN	2	1556.55	0
23710	GABARAPL1	2	1547.86	0
23603	CORO1C	2	1545.18	0
5979	RET	2	1531.18	0
7133	TNFRSF1B	2	1495.47	0
5516	PPP2CB	2	1494.85	0
5879	RAC1	2	1491.65	0
10332	CLEC4M	2	1481.05	0
26136	TES	2	1427.89	0
1488	CTBP2	2	1389.05	0
23118	TAB2	2	1385.12	0
64841	GNPNAT1	2	1363.91	0
9094	UNC119	2	1355.51	0
580	BARD1	2	1339.17	0
7416	VDAC1	2	1331.02	0
4035	LRP1	2	1302.14	0
301	ANXA1	2	1292.11	0
83737	ITCH	2	1290.32	0
7533	YWHAH	2	1283.6	0
682	BSG	2	1281.13	0
7375	USP4	2	1203.66	0
1080	CFTR	2	1191.35	0
4350	MPG	2	1149.46	0
84708	LNX1	2	1115.58	0
10856	RUVBL2	2	1099.5	0
23204	ARL6IP1	2	1069	0
10567	RABAC1	2	1069	0
7162	TPBG	2	1042.28	0
672	BRCA1	2	1037.87	0
10014	HDAC5	2	1034.23	0
6517	SLC2A4	2	1033.8	0
821	CANX	2	1007.14	0
1600	DAB1	2	974.4	0
166	AES	2	957.44	0
84132	USP42	2	954.71	0
11035	RIPK3	2	951.75	0
9924	PAN2	2	951.75	0
114609	TIRAP	2	917.89	0
1147	CHUK	2	869.4	0
3842	TNPO1	2	866.56	0
3636	INPPL1	2	866.56	0
10128	LRPPRC	2	866.56	0
7417	VDAC2	2	866.56	0
1655	DDX5	2	866.56	0
100616387	MIR3064	2	866.56	0
100616408	MIR5047	2	866.56	0
55040	EPN3	2	824.32	0
2633	GBP1	2	813.99	0
3611	ILK	2	773.64	0
8065	CUL5	2	762.03	0
3572	IL6ST	2	731.52	0
7597	ZBTB25	2	729.82	0
1017	CDK2	2	724.21	0
2114	ETS2	2	718.91	0
1398	CRK	2	715.64	0
1499	CTNNB1	2	686.71	0
4311	MME	2	674.23	0
84445	LZTS2	2	650.24	0
1562	CYP2C18	2	640.15	0
150	ADRA2A	2	639.81	0
6908	TBP	2	634.62	0
633	BGN	2	605.71	0
9479	MAPK8IP1	2	590.9	0
2185	PTK2B	2	590.9	0
644172	LOC644172	2	590.9	0
3661	IRF3	2	548.87	0
3717	JAK2	2	542.38	0
1316	KLF6	2	521.21	0
6628	SNRPB	2	494.86	0
1107	CHD3	2	479.94	0
1896	EDA	2	454.4	0
6403	SELP	2	450.25	0
7462	LAT2	2	445.82	0
25942	SIN3A	2	442.84	0
2113	ETS1	2	442.84	0
8470	SORBS2	2	426.58	0
3981	LIG4	2	425.45	0
3654	IRAK1	2	425.21	0
2014	EMP3	2	423.52	0
6223	RPS19	2	416.79	0
330	BIRC3	2	416.35	0
5578	PRKCA	2	391.46	0
6667	SP1	2	379.02	0
100506658	OCLN	2	378.51	0
8318	CDC45	2	366.95	0
3659	IRF1	2	360.63	0
10755	GIPC1	2	352.22	0
10868	USP20	2	351.64	0
22803	XRN2	2	348.67	0
55922	NKRF	2	348.67	0
27067	STAU2	2	348.67	0
7128	TNFAIP3	2	334.47	0
3903	LAIR1	2	329.41	0
5971	RELB	2	323.87	0
10382	TUBB4A	2	323.87	0
6500	SKP1	2	323.87	0
7278	TUBA3C	2	323.87	0
113457	TUBA3D	2	323.87	0
4245	MGAT1	2	317.71	0
94	ACVRL1	2	311.52	0
7046	TGFBR1	2	311.52	0
7048	TGFBR2	2	311.52	0
26784	SNORA64	2	308.52	0
26790	SNORD58B	2	308.52	0
220988	HNRNPA3	2	308.52	0
10189	ALYREF	2	308.52	0
100124516	SNORD58C	2	308.52	0
3181	HNRNPA2B1	2	308.52	0
6156	RPL30	2	308.52	0
100616282	MIR4738	2	308.52	0
3021	H3F3B	2	308.52	0
3609	ILF3	2	308.52	0
10492	SYNCRIP	2	308.52	0
6139	RPL17	2	308.52	0
11224	RPL35	2	308.52	0
10594	PRPF8	2	308.52	0
6222	RPS18	2	308.52	0
6191	RPS4X	2	308.52	0
6194	RPS6	2	308.52	0
3020	H3F3A	2	308.52	0
6187	RPS2	2	308.52	0
26791	SNORD58A	2	308.52	0
6217	RPS16	2	308.52	0
10521	DDX17	2	308.52	0
6133	RPL9	2	308.52	0
6202	RPS8	2	308.52	0
6136	RPL12	2	308.52	0
10541	ANP32B	2	308.52	0
27258	LSM3	2	308.52	0
619562	SNORA3	2	308.52	0
3007	HIST1H1D	2	308.52	0
26811	SNORD55	2	308.52	0
94163	SNORD38B	2	308.52	0
6632	SNRPD1	2	308.52	0
6230	RPS25	2	308.52	0
6147	RPL23A	2	308.52	0
6157	RPL27A	2	308.52	0
10575	CCT4	2	308.52	0
6132	RPL8	2	308.52	0
26809	SNORD42A	2	308.52	0
51386	EIF3L	2	308.52	0
3190	HNRNPK	2	308.52	0
6154	RPL26	2	308.52	0
6203	RPS9	2	308.52	0
6208	RPS14	2	308.52	0
6634	SNRPD3	2	308.52	0
7203	CCT3	2	308.52	0
407043	MIR7-1	2	308.52	0
8452	CUL3	2	299.27	0
2773	GNAI3	2	295.08	0
3728	JUP	2	288.35	0
5962	RDX	2	283	0
3635	INPP5D	2	281.43	0
6778	STAT6	2	277.66	0
7531	YWHAE	2	269.24	0
3066	HDAC2	2	267.07	0
6777	STAT5B	2	252.76	0
8453	CUL2	2	249.01	0
7057	THBS1	2	244.79	0
5499	PPP1CA	2	225.36	0
5335	PLCG1	2	223.62	0
6929	TCF3	2	223.23	0
7185	TRAF1	2	213.2	0
1401	CRP	2	204.09	0
6654	SOS1	2	155.86	0
3587	IL10RA	2	151.39	0
3958	LGALS3	2	142.63	0
50615	IL21R	2	139.11	0
55884	WSB2	2	119.55	0
4240	MFGE8	2	116.47	0
84447	SYVN1	2	107.19	0
1649	DDIT3	2	103.32	0
8877	SPHK1	2	74.14	0
1536	CYBB	2	36.34	0
139716	GAB3	2	22.87	0
928	CD9	2	20.26	0
140545	RNF32	2	0	0
6513	SLC2A1	2	0	0
3238	HOXD12	2	0	0
114990	VASN	2	0	0
8440	NCK2	2	0	0
11252	PACSIN2	2	0	0
29763	PACSIN3	2	0	0
11193	WBP4	2	0	0
7525	YES1	2	0	0
9564	BCAR1	2	0	0
5663	PSEN1	2	0	0
11140	CDC37	2	0	0
3683	ITGAL	2	0	0
7188	TRAF5	2	0	0
10188	TNK2	2	0	0
29993	PACSIN1	2	0	0
84958	SYTL1	2	0	0
241	ALOX5AP	1	0	0
51617	HMP19	1	0	0
3437	IFIT3	1	0	0
2290	FOXG1	1	0	0
7301	TYRO3	1	0	0
54850	FBXL12	1	0	0
51295	ECSIT	1	0	0
5110	PCMT1	1	0	0
5360	PLTP	1	0	0
7001	PRDX2	1	0	0
3240	HP	1	0	0
9911	TMCC2	1	0	0
53822	FXYD7	1	0	0
4036	LRP2	1	0	0
90580	C19orf52	1	0	0
7436	VLDLR	1	0	0
55738	ARFGAP1	1	0	0
24138	IFIT5	1	0	0
22874	PLEKHA6	1	0	0
2537	IFI6	1	0	0
10261	IGSF6	1	0	0
146722	CD300LF	1	0	0
146225	CMTM2	1	0	0
474344	GIMAP6	1	0	0
80301	PLEKHO2	1	0	0
7204	TRIO	1	0	0
4296	MAP3K11	1	0	0
397	ARHGDIB	1	0	0
3757	KCNH2	1	0	0
666	BOK	1	0	0
171483	FAM9B	1	0	0
8503	PIK3R3	1	0	0
23002	DAAM1	1	0	0
5328	PLAU	1	0	0
4615	MYD88	1	0	0
5588	PRKCQ	1	0	0
6401	SELE	1	0	0
5648	MASP1	1	0	0
10114	HIPK3	1	0	0
9063	PIAS2	1	0	0
60401	EDA2R	1	0	0
409	ARRB2	1	0	0
727	C5	1	0	0
5217	PFN2	1	0	0
126208	ZNF787	1	0	0
1315	COPB1	1	0	0
23788	MTCH2	1	0	0
4008	LMO7	1	0	0
55210	ATAD3A	1	0	0
55114	ARHGAP17	1	0	0
23	ABCF1	1	0	0
11151	CORO1A	1	0	0
10363	HMG20A	1	0	0
6891	TAP2	1	0	0
7184	HSP90B1	1	0	0
25929	GEMIN5	1	0	0
2314	FLII	1	0	0
100500842	MIR3652	1	0	0
945	CD33	1	0	0
23607	CD2AP	1	0	0
965	CD58	1	0	0
1974	EIF4A2	1	0	0
619567	SNORD2	1	0	0
619568	SNORA4	1	0	0
2060	EPS15	1	0	0
1234	CCR5	1	0	0
10202	DHRS2	1	0	0
5243	ABCB1	1	0	0
100302143	MIR1248	1	0	0
309	ANXA6	1	0	0
6043	SNORA63	1	0	0
677847	SNORA81	1	0	0
8514	KCNAB2	1	0	0
10572	SIVA1	1	0	0
80772	GLTPD1	1	0	0
26286	ARFGAP3	1	0	0
11213	IRAK3	1	0	0
3929	LBP	1	0	0
728441	GGT2	1	0	0
2678	GGT1	1	0	0
10507	SEMA4D	1	0	0
6399	TRAPPC2	1	0	0
51726	DNAJB11	1	0	0
5154	PDGFA	1	0	0
4099	MAG	1	0	0
2740	GLP1R	1	0	0
10267	RAMP1	1	0	0
926	CD8B	1	0	0
7083	TK1	1	0	0
7071	KLF10	1	0	0
10912	GADD45G	1	0	0
5538	PPT1	1	0	0
84174	SLA2	1	0	0
2275	FHL3	1	0	0
55620	STAP2	1	0	0
259	AMBP	1	0	0
25895	METTL21B	1	0	0
5129	CDK18	1	0	0
310	ANXA7	1	0	0
79607	FAM118B	1	0	0
54464	XRN1	1	0	0
5997	RGS2	1	0	0
10253	SPRY2	1	0	0
1762	DMWD	1	0	0
51377	UCHL5	1	0	0
8045	RASSF7	1	0	0
9182	RASSF9	1	0	0
7373	COL14A1	1	0	0
197	AHSG	1	0	0
56925	LXN	1	0	0
655	BMP7	1	0	0
471	ATIC	1	0	0
1857	DVL3	1	0	0
8607	RUVBL1	1	0	0
7941	PLA2G7	1	0	0
55905	RNF114	1	0	0
952	CD38	1	0	0
22	ABCB7	1	0	0
1601	DAB2	1	0	0
29899	GPSM2	1	0	0
8490	RGS5	1	0	0
63940	GPSM3	1	0	0
2783	GNB2	1	0	0
64407	RGS18	1	0	0
2782	GNB1	1	0	0
1268	CNR1	1	0	0
5999	RGS4	1	0	0
1241	LTB4R	1	0	0
6004	RGS16	1	0	0
5998	RGS3	1	0	0
4924	NUCB1	1	0	0
8601	RGS20	1	0	0
4306	NR3C2	1	0	0
2063	NR2F6	1	0	0
6599	SMARCC1	1	0	0
3175	ONECUT1	1	0	0
7110	TMF1	1	0	0
4488	MSX2	1	0	0
26137	ZBTB20	1	0	0
915	CD3D	1	0	0
23426	GRIP1	1	0	0
6256	RXRA	1	0	0
51363	CHST15	1	0	0
2889	RAPGEF1	1	0	0
27	ABL2	1	0	0
23650	TRIM29	1	0	0
23648	SSBP3	1	0	0
8289	ARID1A	1	0	0
23512	SUZ12	1	0	0
23119	HIC2	1	0	0
5928	RBBP4	1	0	0
23411	SIRT1	1	0	0
7353	UFD1L	1	0	0
6143	RPL19	1	0	0
619565	SNORA52	1	0	0
51121	RPL26L1	1	0	0
6727	SRP14	1	0	0
8666	EIF3G	1	0	0
6152	RPL24	1	0	0
8667	EIF3H	1	0	0
6627	SNRPA1	1	0	0
6949	TCOF1	1	0	0
6418	SET	1	0	0
8665	EIF3F	1	0	0
6209	RPS15	1	0	0
3008	HIST1H1E	1	0	0
3006	HIST1H1C	1	0	0
6181	RPLP2	1	0	0
6428	SRSF3	1	0	0
51087	YBX2	1	0	0
6228	RPS23	1	0	0
8531	CSDA	1	0	0
6165	RPL35A	1	0	0
80270	HSD3B7	1	0	0
5932	RBBP8	1	0	0
7850	IL1R2	1	0	0
54386	TERF2IP	1	0	0
3159	HMGA1	1	0	0
3600	IL15	1	0	0
23511	NUP188	1	0	0
10465	PPIH	1	0	0
22872	SEC31A	1	0	0
84284	NTPCR	1	0	0
724102	SNHG4	1	0	0
6389	SDHA	1	0	0
1933	EEF1B2	1	0	0
3182	HNRNPAB	1	0	0
8570	KHSRP	1	0	0
347733	TUBB2B	1	0	0
7919	DDX39B	1	0	0
1314	COPA	1	0	0
23347	SMCHD1	1	0	0
9782	MATR3	1	0	0
7037	TFRC	1	0	0
84545	MRPL43	1	0	0
692199	SNORD84	1	0	0
1665	DHX15	1	0	0
989	2020-09-07	1	0	0
5880	RAC2	1	0	0
6726	SRP9	1	0	0
51639	SF3B14	1	0	0
10146	G3BP1	1	0	0
574040	SNORA6	1	0	0
10694	CCT8	1	0	0
5036	PA2G4	1	0	0
38	ACAT1	1	0	0
1982	EIF4G2	1	0	0
3838	KPNA2	1	0	0
6636	SNRPF	1	0	0
55127	HEATR1	1	0	0
4301	MLLT4	1	0	0
3945	LDHB	1	0	0
7414	VCL	1	0	0
128866	CHMP4B	1	0	0
10016	PDCD6	1	0	0
10094	ARPC3	1	0	0
1653	DDX1	1	0	0
10949	HNRNPA0	1	0	0
27243	CHMP2A	1	0	0
377	ARF3	1	0	0
1104	RCC1	1	0	0
6210	RPS15A	1	0	0
372	ARCN1	1	0	0
10574	CCT7	1	0	0
3329	HSPD1	1	0	0
10432	RBM14	1	0	0
7073	TIAL1	1	0	0
23170	TTLL12	1	0	0
85439	STON2	1	0	0
9026	HIP1R	1	0	0
3856	KRT8	1	0	0
1615	DARS	1	0	0
9040	UBE2M	1	0	0
3183	HNRNPC	1	0	0
9798	IST1	1	0	0
7280	TUBB2A	1	0	0
4175	MCM6	1	0	0
8880	FUBP1	1	0	0
1175	AP2S1	1	0	0
3921	RPSA	1	0	0
5694	PSMB6	1	0	0
84790	TUBA1C	1	0	0
50	ACO2	1	0	0
373156	GSTK1	1	0	0
10985	GCN1L1	1	0	0
5688	PSMA7	1	0	0
3189	HNRNPH3	1	0	0
1938	EEF2	1	0	0
3880	KRT19	1	0	0
6044	SNORA62	1	0	0
8021	NUP214	1	0	0
5908	RAP1B	1	0	0
10576	CCT2	1	0	0
9898	UBAP2L	1	0	0
1211	CLTA	1	0	0
521	ATP5I	1	0	0
619569	SNORA41	1	0	0
51520	LARS	1	0	0
10236	HNRNPR	1	0	0
23020	SNRNP200	1	0	0
1981	EIF4G1	1	0	0
1072	CFL1	1	0	0
1778	DYNC1H1	1	0	0
55737	VPS35	1	0	0
6421	SFPQ	1	0	0
79869	CPSF7	1	0	0
52	ACP1	1	0	0
3848	KRT1	1	0	0
23367	LARP1	1	0	0
6059	ABCE1	1	0	0
27292	DIMT1	1	0	0
1965	EIF2S1	1	0	0
5831	PYCR1	1	0	0
6169	RPL38	1	0	0
8301	PICALM	1	0	0
10963	STIP1	1	0	0
4141	MARS	1	0	0
4628	MYH10	1	0	0
4733	DRG1	1	0	0
3191	HNRNPL	1	0	0
23435	TARDBP	1	0	0
92815	HIST3H2A	1	0	0
3185	HNRNPF	1	0	0
5885	RAD21	1	0	0
56899	ANKS1B	1	0	0
5710	PSMD4	1	0	0
7409	VAV1	1	0	0
2274	FHL2	1	0	0
10666	CD226	1	0	0
7070	THY1	1	0	0
6456	SH3GL2	1	0	0
50628	GEMIN4	1	0	0
3791	KDR	1	0	0
3265	HRAS	1	0	0
56241	SUSD2	1	0	0
5788	PTPRC	1	0	0
4005	LMO2	1	0	0
10765	KDM5B	1	0	0
4824	NKX3-1	1	0	0
7849	PAX8	1	0	0
90427	BMF	1	0	0
6440	SFTPC	1	0	0
7058	THBS2	1	0	0
201161	CENPV	1	0	0
6382	SDC1	1	0	0
23517	SKIV2L2	1	0	0
51574	LARP7	1	0	0
55646	LYAR	1	0	0
1656	DDX6	1	0	0
54433	GAR1	1	0	0
100113381	SNORD19B	1	0	0
8886	DDX18	1	0	0
55035	NOL8	1	0	0
23542	MAPK8IP2	1	0	0
8971	H1FX	1	0	0
400506	C16orf88	1	0	0
23196	FAM120A	1	0	0
10412	NSA2	1	0	0
84549	MAK16	1	0	0
51018	RRP15	1	0	0
11103	KRR1	1	0	0
26354	GNL3	1	0	0
5500	PPP1CB	1	0	0
5955	RCN2	1	0	0
51602	NOP58	1	0	0
23378	RRP8	1	0	0
5394	EXOSC10	1	0	0
9816	URB2	1	0	0
4179	CD46	1	0	0
7248	TSC1	1	0	0
6402	SELL	1	0	0
5602	MAPK10	1	0	0
9368	SLC9A3R1	1	0	0
984	CDK11B	1	0	0
9657	IQCB1	1	0	0
26984	SEC22A	1	0	0
6117	RPA1	1	0	0
6320	CLEC11A	1	0	0
8554	PIAS1	1	0	0
6197	RPS6KA3	1	0	0
64412	GZF1	1	0	0
4739	NEDD9	1	0	0
5432	POLR2C	1	0	0
23085	ERC1	1	0	0
6790	AURKA	1	0	0
7052	TGM2	1	0	0
3215	HOXB5	1	0	0
6195	RPS6KA1	1	0	0
79191	IRX3	1	0	0
3232	HOXD3	1	0	0
1	A1BG	1	0	0
8544	PIR	1	0	0
64375	IKZF4	1	0	0
219541	MED19	1	0	0
5685	PSMA4	1	0	0
23291	FBXW11	1	0	0
9532	BAG2	1	0	0
5537	PPP6C	1	0	0
3313	HSPA9	1	0	0
55075	UACA	1	0	0
84078	KBTBD7	1	0	0
9701	PPP6R2	1	0	0
92344	GORAB	1	0	0
3632	INPP5A	1	0	0
8436	SDPR	1	0	0
2162	F13A1	1	0	0
267	AMFR	1	0	0
4359	MPZ	1	0	0
5824	PEX19	1	0	0
84722	PSRC1	1	0	0
6445	SGCG	1	0	0
202051	SPATA24	1	0	0
5147	PDE6D	1	0	0
11006	LILRB4	1	0	0
10456	HAX1	1	0	0
65991	FUNDC2	1	0	0
2532	DARC	1	0	0
5111	PCNA	1	0	0
4999	ORC2	1	0	0
4171	MCM2	1	0	0
1238	CCBP2	1	0	0
4763	NF1	1	0	0
3909	LAMA3	1	0	0
149628	PYHIN1	1	0	0
8573	CASK	1	0	0
6385	SDC4	1	0	0
3708	ITPR1	1	0	0
4100	MAGEA1	1	0	0
5159	PDGFRB	1	0	0
9354	UBE4A	1	0	0
4654	MYOD1	1	0	0
6720	SREBF1	1	0	0
55636	CHD7	1	0	0
6095	RORA	1	0	0
5468	PPARG	1	0	0
23043	TNIK	1	0	0
57602	USP36	1	0	0
51608	GET4	1	0	0
100129518	LOC100129518	1	0	0
6789	STK4	1	0	0
66002	CYP4F12	1	0	0
10289	EIF1B	1	0	0
57670	KIAA1549	1	0	0
4626	MYH8	1	0	0
5914	RARA	1	0	0
1052	CEBPD	1	0	0
6497	SKI	1	0	0
5699	PSMB10	1	0	0
2625	GATA3	1	0	0
604	BCL6	1	0	0
5925	RB1	1	0	0
3394	IRF8	1	0	0
2495	FTH1	1	0	0
30836	DNTTIP2	1	0	0
8019	BRD3	1	0	0
4130	MAP1A	1	0	0
11138	TBC1D8	1	0	0
64418	TMEM168	1	0	0
23646	PLD3	1	0	0
5930	RBBP6	1	0	0
27125	AFF4	1	0	0
758	MPPED1	1	0	0
1641	DCX	1	0	0
23557	SNAPIN	1	0	0
123920	CMTM3	1	0	0
7178	TPT1	1	0	0
22832	KIAA1009	1	0	0
9101	USP8	1	0	0
1043	CD52	1	0	0
1827	RCAN1	1	0	0
55715	DOK4	1	0	0
55677	IWS1	1	0	0
2207	FCER1G	1	0	0
124857	WFIKKN2	1	0	0
2331	FMOD	1	0	0
7049	TGFBR3	1	0	0
2615	LRRC32	1	0	0
3912	LAMB1	1	0	0
9400	RECQL5	1	0	0
54472	TOLLIP	1	0	0
7132	TNFRSF1A	1	0	0
10928	RALBP1	1	0	0
1789	DNMT3B	1	0	0
1025	CDK9	1	0	0
3202	HOXA5	1	0	0
7547	ZIC3	1	0	0
7292	TNFSF4	1	0	0
157638	FAM84B	1	0	0
51429	SNX9	1	0	0
5800	PTPRO	1	0	0
55971	BAIAP2L1	1	0	0
23048	FNBP1	1	0	0
10109	ARPC2	1	0	0
10095	ARPC1B	1	0	0
4690	NCK1	1	0	0
10922	FASTK	1	0	0
322	APBB1	1	0	0
54165	DCUN1D1	1	0	0
94240	EPSTI1	1	0	0
6566	SLC16A1	1	0	0
5837	PYGM	1	0	0
55233	MOB1A	1	0	0
51562	MBIP	1	0	0
54819	ZCCHC10	1	0	0
83541	FAM110A	1	0	0
115106	HAUS1	1	0	0
26258	PLDN	1	0	0
54407	SLC38A2	1	0	0
6812	STXBP1	1	0	0
143884	CWF19L2	1	0	0
26121	PRPF31	1	0	0
10403	NDC80	1	0	0
387856	C12orf68	1	0	0
10524	KAT5	1	0	0
329	BIRC2	1	0	0
8835	SOCS2	1	0	0
5921	RASA1	1	0	0
37	ACADVL	1	0	0
158405	KIAA1958	1	0	0
55201	MAP1S	1	0	0
5170	PDPK1	1	0	0
3953	LEPR	1	0	0
5600	MAPK11	1	0	0
3480	IGF1R	1	0	0
2674	GFRA1	1	0	0
8660	IRS2	1	0	0
6921	TCEB1	1	0	0
4833	NME4	1	0	0
26060	APPL1	1	0	0
55723	ASF1B	1	0	0
57484	RNF150	1	0	0
861	RUNX1	1	0	0
23013	SPEN	1	0	0
4214	MAP3K1	1	0	0
100506403	LOC100506403	1	0	0
10135	NAMPT	1	0	0
10425	ARIH2	1	0	0
9491	PSMF1	1	0	0
7169	TPM2	1	0	0
23624	CBLC	1	0	0
7251	TSG101	1	0	0
22938	SNW1	1	0	0
2669	GEM	1	0	0
7718	ZNF165	1	0	0
51213	LUZP4	1	0	0
10771	ZMYND11	1	0	0
91056	AP5B1	1	0	0
57144	PAK7	1	0	0
79025	C20orf195	1	0	0
84080	C16orf48	1	0	0
7182	NR2C2	1	0	0
64753	CCDC136	1	0	0
57142	RTN4	1	0	0
92840	REEP6	1	0	0
1312	COMT	1	0	0
51741	WWOX	1	0	0
11130	ZWINT	1	0	0
9627	SNCAIP	1	0	0
4862	NPAS2	1	0	0
9631	NUP155	1	0	0
79090	TRAPPC6A	1	0	0
640	BLK	1	0	0
26578	OSTF1	1	0	0
2775	GNAO1	1	0	0
28962	OSTM1	1	0	0
3196	TLX2	1	0	0
4089	SMAD4	1	0	0
57205	ATP10D	1	0	0
115650	TNFRSF13C	1	0	0
8741	TNFSF13	1	0	0
23495	TNFRSF13B	1	0	0
3105	HLA-A	1	0	0
6036	RNASE2	1	0	0
9056	SLC7A7	1	0	0
10219	KLRG1	1	0	0
84282	RNF135	1	0	0
9474	ATG5	1	0	0
4155	MBP	1	0	0
5612	PRKRIR	1	0	0
27005	USP21	1	0	0
7706	TRIM25	1	0	0
23612	PHLDA3	1	0	0
890	CCNA2	1	0	0
9730	VPRBP	1	0	0
2209	FCGR1A	1	0	0
10302	SNAPC5	1	0	0
10256	CNKSR1	1	0	0
51421	AMOTL2	1	0	0
8812	CCNK	1	0	0
9586	CREB5	1	0	0
27332	ZNF638	1	0	0
473	RERE	1	0	0
401317	LOC401317	1	0	0
114822	RHPN1	1	0	0
79088	ZNF426	1	0	0
117144	CATSPER1	1	0	0
26150	RIBC2	1	0	0
4015	LOX	1	0	0
57088	PLSCR4	1	0	0
1295	COL8A1	1	0	0
358	AQP1	1	0	0
1048	CEACAM5	1	0	0
8407	TAGLN2	1	0	0
23301	EHBP1	1	0	0
55773	TBC1D23	1	0	0
10454	TAB1	1	0	0
55633	TBC1D22B	1	0	0
285672	SREK1IP1	1	0	0
6631	SNRPC	1	0	0
767	CA8	1	0	0
80007	C10orf88	1	0	0
7874	USP7	1	0	0
10000	AKT3	1	0	0
4090	SMAD5	1	0	0
3430	IFI35	1	0	0
208	AKT2	1	0	0
3337	DNAJB1	1	0	0
5058	PAK1	1	0	0
89953	KLC4	1	0	0
55740	ENAH	1	0	0
51466	EVL	1	0	0
9454	HOMER3	1	0	0
1838	DTNB	1	0	0
4111	MAGEA12	1	0	0
64395	GMCL1	1	0	0
1000	CDH2	1	0	0
10672	GNA13	1	0	0
253260	RICTOR	1	0	0
57521	RPTOR	1	0	0
2778	GNAS	1	0	0
572	BAD	1	0	0
596	BCL2	1	0	0
4222	MEOX1	1	0	0
167227	DCP2	1	0	0
51110	LACTB2	1	0	0
23450	SF3B3	1	0	0
9737	GPRASP1	1	0	0
22918	CD93	1	0	0
23028	KDM1A	1	0	0
27122	DKK3	1	0	0
64127	NOD2	1	0	0
8915	BCL10	1	0	0
51764	GNG13	1	0	0
5082	PDCL	1	0	0
5204	PFDN5	1	0	0
2788	GNG7	1	0	0
94235	GNG8	1	0	0
63943	FKBPL	1	0	0
2790	GNG10	1	0	0
7532	YWHAG	1	0	0
114792	KLHL32	1	0	0
665	BNIP3L	1	0	0
4815	NINJ2	1	0	0
80332	ADAM33	1	0	0
60343	FAM3A	1	0	0
23405	DICER1	1	0	0
5610	EIF2AK2	1	0	0
55602	CDKN2AIP	1	0	0
7140	TNNT3	1	0	0
7289	TULP3	1	0	0
6651	SON	1	0	0
7168	TPM1	1	0	0
202333	CMYA5	1	0	0
55827	DCAF6	1	0	0
79705	LRRK1	1	0	0
11117	EMILIN1	1	0	0
4152	MBD1	1	0	0
6839	SUV39H1	1	0	0
7325	UBE2E2	1	0	0
135138	PACRG	1	0	0
284312	ZSCAN1	1	0	0
9587	MAD2L1BP	1	0	0
22929	SEPHS1	1	0	0
2932	GSK3B	1	0	0
3845	KRAS	1	0	0
6783	SULT1E1	1	0	0
8527	DGKD	1	0	0
7114	TMSB4X	1	0	0
5717	PSMD11	1	0	0
55643	BTBD2	1	0	0
10910	SUGT1	1	0	0
79095	C9orf16	1	0	0
8972	MGAM	1	0	0
51053	GMNN	1	0	0
16	AARS	1	0	0
58	ACTA1	1	0	0
59	ACTA2	1	0	0
70	ACTC1	1	0	0
89	ACTN3	1	0	0
90	ACVR1	1	0	0
134	ADORA1	1	0	0
140	ADORA3	1	0	0
196	AHR	1	0	0
211	ALAS1	1	0	0
217	ALDH2	1	0	0
291	SLC25A4	1	0	0
306	ANXA3	1	0	0
355	FAS	1	0	0
375	ARF1	1	0	0
382	ARF6	1	0	0
393	ARHGAP4	1	0	0
398	ARHGDIG	1	0	0
435	ASL	1	0	0
466	ATF1	1	0	0
481	ATP1B1	1	0	0
539	ATP5O	1	0	0
550	AUP1	1	0	0
571	BACH1	1	0	0
608	TNFRSF17	1	0	0
637	BID	1	0	0
664	BNIP3	1	0	0
667	DST	1	0	0
669	BPGM	1	0	0
708	C1QBP	1	0	0
716	C1S	1	0	0
773	CACNA1A	1	0	0
826	CAPNS1	1	0	0
832	CAPZB	1	0	0
834	CASP1	1	0	0
841	CASP8	1	0	0
896	CCND3	1	0	0
908	CCT6A	1	0	0
917	CD3G	1	0	0
919	CD247	1	0	0
921	CD5	1	0	0
931	MS4A1	1	0	0
947	CD34	1	0	0
960	CD44	1	0	0
962	CD48	1	0	0
967	CD63	1	0	0
972	CD74	1	0	0
990	CDC6	1	0	0
999	CDH1	1	0	0
1026	CDKN1A	1	0	0
1031	CDKN2C	1	0	0
1032	CDKN2D	1	0	0
1105	CHD1	1	0	0
1130	LYST	1	0	0
1154	CISH	1	0	0
1232	CCR3	1	0	0
1339	COX6A2	1	0	0
1385	CREB1	1	0	0
1386	ATF2	1	0	0
1410	CRYAB	1	0	0
1438	CSF2RA	1	0	0
1459	CSNK2A2	1	0	0
1469	CST1	1	0	0
1487	CTBP1	1	0	0
1558	CYP2C8	1	0	0
1627	DBN1	1	0	0
1647	GADD45A	1	0	0
1674	DES	1	0	0
1727	CYB5R3	1	0	0
1780	DYNC1I1	1	0	0
1832	DSP	1	0	0
1880	GPR183	1	0	0
1917	EEF1A2	1	0	0
1958	EGR1	1	0	0
1973	EIF4A1	1	0	0
1999	ELF3	1	0	0
2002	ELK1	1	0	0
2017	CTTN	1	0	0
2035	EPB41	1	0	0
2057	EPOR	1	0	0
2059	EPS8	1	0	0
2078	ERG	1	0	0
2079	ERH	1	0	0
2101	ESRRA	1	0	0
2147	F2	1	0	0
2197	FAU	1	0	0
2219	FCN1	1	0	0
2288	FKBP4	1	0	0
2321	FLT1	1	0	0
2339	FNTA	1	0	0
2533	FYB	1	0	0
2548	GAA	1	0	0
2624	GATA2	1	0	0
2639	GCDH	1	0	0
2781	GNAZ	1	0	0
2787	GNG5	1	0	0
2791	GNG11	1	0	0
2793	GNGT2	1	0	0
3017	HIST1H2BD	1	0	0
3046	HBE1	1	0	0
3047	HBG1	1	0	0
3064	HTT	1	0	0
3082	HGF	1	0	0
3087	HHEX	1	0	0
3096	HIVEP1	1	0	0
3099	HK2	1	0	0
3107	HLA-C	1	0	0
3134	HLA-F	1	0	0
3163	HMOX2	1	0	0
3212	HOXB2	1	0	0
3225	HOXC9	1	0	0
3267	AGFG1	1	0	0
3276	PRMT1	1	0	0
3305	HSPA1L	1	0	0
3308	HSPA4	1	0	0
3336	HSPE1	1	0	0
3384	ICAM2	1	0	0
3398	ID2	1	0	0
3428	IFI16	1	0	0
3454	IFNAR1	1	0	0
3479	IGF1	1	0	0
3481	IGF2	1	0	0
3488	IGFBP5	1	0	0
3566	IL4R	1	0	0
3595	IL12RB2	1	0	0
3608	ILF2	1	0	0
3643	INSR	1	0	0
3667	IRS1	1	0	0
3681	ITGAD	1	0	0
3687	ITGAX	1	0	0
3702	ITK	1	0	0
3718	JAK3	1	0	0
3730	KAL1	1	0	0
3732	CD82	1	0	0
3801	KIFC3	1	0	0
3822	KLRC2	1	0	0
3843	IPO5	1	0	0
3860	KRT13	1	0	0
3875	KRT18	1	0	0
3920	LAMP2	1	0	0
3939	LDHA	1	0	0
4000	LMNA	1	0	0
4004	LMO1	1	0	0
4046	LSP1	1	0	0
4052	LTBP1	1	0	0
4064	CD180	1	0	0
4087	SMAD2	1	0	0
4092	SMAD7	1	0	0
4110	MAGEA11	1	0	0
4131	MAP1B	1	0	0
4137	MAPT	1	0	0
4154	MBNL1	1	0	0
4168	MCF2	1	0	0
4174	MCM5	1	0	0
4204	MECP2	1	0	0
4215	MAP3K3	1	0	0
4217	MAP3K5	1	0	0
4288	MKI67	1	0	0
4292	MLH1	1	0	0
4314	MMP3	1	0	0
4354	MPP1	1	0	0
4606	MYBPC2	1	0	0
4627	MYH9	1	0	0
4635	MYL4	1	0	0
4637	MYL6	1	0	0
4659	PPP1R12A	1	0	0
4670	HNRNPM	1	0	0
4671	NAIP	1	0	0
4722	NDUFS3	1	0	0
4736	RPL10A	1	0	0
4741	NEFM	1	0	0
4843	NOS2	1	0	0
4860	PNP	1	0	0
4905	NSF	1	0	0
5000	ORC4	1	0	0
5001	ORC5	1	0	0
5031	P2RY6	1	0	0
5047	PAEP	1	0	0
5049	PAFAH1B2	1	0	0
5094	PCBP2	1	0	0
5155	PDGFB	1	0	0
5164	PDK2	1	0	0
5245	PHB	1	0	0
5265	SERPINA1	1	0	0
5272	SERPINB9	1	0	0
5292	PIM1	1	0	0
5300	PIN1	1	0	0
5315	PKM2	1	0	0
5320	PLA2G2A	1	0	0
5439	POLR2J	1	0	0
5452	POU2F2	1	0	0
5469	MED1	1	0	0
5533	PPP3CC	1	0	0
5535	PPP3R2	1	0	0
5536	PPP5C	1	0	0
5564	PRKAB1	1	0	0
5565	PRKAB2	1	0	0
5567	PRKACB	1	0	0
5587	PRKD1	1	0	0
5594	MAPK1	1	0	0
5601	MAPK9	1	0	0
5618	PRLR	1	0	0
5654	HTRA1	1	0	0
5684	PSMA3	1	0	0
5686	PSMA5	1	0	0
5689	PSMB1	1	0	0
5690	PSMB2	1	0	0
5709	PSMD3	1	0	0
5719	PSMD13	1	0	0
5733	PTGER3	1	0	0
5753	PTK6	1	0	0
5763	PTMS	1	0	0
5782	PTPN12	1	0	0
5787	PTPRB	1	0	0
5790	PTPRCAP	1	0	0
5793	PTPRG	1	0	0
5795	PTPRJ	1	0	0
5813	PURA	1	0	0
5833	PCYT2	1	0	0
5867	RAB4A	1	0	0
5868	RAB5A	1	0	0
5878	RAB5C	1	0	0
5883	RAD9A	1	0	0
5886	RAD23A	1	0	0
5901	RAN	1	0	0
5912	RAP2B	1	0	0
5935	RBM3	1	0	0
5976	UPF1	1	0	0
6003	RGS13	1	0	0
6009	RHEB	1	0	0
6097	RORC	1	0	0
6128	RPL6	1	0	0
6141	RPL18	1	0	0
6144	RPL21	1	0	0
6155	RPL27	1	0	0
6160	RPL31	1	0	0
6176	RPLP1	1	0	0
6192	RPS4Y1	1	0	0
6193	RPS5	1	0	0
6198	RPS6KB1	1	0	0
6201	RPS7	1	0	0
6204	RPS10	1	0	0
6205	RPS11	1	0	0
6229	RPS24	1	0	0
6233	RPS27A	1	0	0
6234	RPS28	1	0	0
6249	CLIP1	1	0	0
6273	S100A2	1	0	0
6280	S100A9	1	0	0
6311	ATXN2	1	0	0
6314	ATXN7	1	0	0
6317	SERPINB3	1	0	0
6390	SDHB	1	0	0
6398	SECTM1	1	0	0
6434	TRA2B	1	0	0
6441	SFTPD	1	0	0
6452	SH3BP2	1	0	0
6461	SHB	1	0	0
6462	SHBG	1	0	0
6502	SKP2	1	0	0
6612	SUMO3	1	0	0
6616	SNAP25	1	0	0
6619	SNAPC3	1	0	0
6622	SNCA	1	0	0
6623	SNCG	1	0	0
6625	SNRNP70	1	0	0
6633	SNRPD2	1	0	0
6638	SNRPN	1	0	0
6657	SOX2	1	0	0
6662	SOX9	1	0	0
6672	SP100	1	0	0
6695	SPOCK1	1	0	0
6709	SPTAN1	1	0	0
6722	SRF	1	0	0
6767	ST13	1	0	0
6872	TAF1	1	0	0
6874	TAF4	1	0	0
6876	TAGLN	1	0	0
6885	MAP3K7	1	0	0
6897	TARS	1	0	0
6923	TCEB2	1	0	0
6927	HNF1A	1	0	0
6934	TCF7L2	1	0	0
6950	TCP1	1	0	0
7010	TEK	1	0	0
7026	NR2F2	1	0	0
7027	TFDP1	1	0	0
7030	TFE3	1	0	0
7036	TFR2	1	0	0
7082	TJP1	1	0	0
7094	TLN1	1	0	0
7105	TSPAN6	1	0	0
7112	TMPO	1	0	0
7127	TNFAIP2	1	0	0
7130	TNFAIP6	1	0	0
7138	TNNT1	1	0	0
7150	TOP1	1	0	0
7170	TPM3	1	0	0
7175	TPR	1	0	0
7260	TSSC1	1	0	0
7277	TUBA4A	1	0	0
7284	TUFM	1	0	0
7297	TYK2	1	0	0
7298	TYMS	1	0	0
7337	UBE3A	1	0	0
7341	SUMO1	1	0	0
7419	VDAC3	1	0	0
7504	XK	1	0	0
7514	XPO1	1	0	0
7536	SF1	1	0	0
7538	ZFP36	1	0	0
7552	ZNF711	1	0	0
7555	CNBP	1	0	0
7704	ZBTB16	1	0	0
7786	MAP3K12	1	0	0
7804	LRP8	1	0	0
7851	MALL	1	0	0
8204	NRIP1	1	0	0
8216	LZTR1	1	0	0
8291	DYSF	1	0	0
8329	HIST1H2AI	1	0	0
8330	HIST1H2AK	1	0	0
8332	HIST1H2AL	1	0	0
8336	HIST1H2AM	1	0	0
8341	HIST1H2BN	1	0	0
8405	SPOP	1	0	0
8473	OGT	1	0	0
8487	GEMIN2	1	0	0
8533	COPS3	1	0	0
8565	YARS	1	0	0
8568	RRP1	1	0	0
8631	SKAP1	1	0	0
8663	EIF3C	1	0	0
8673	VAMP8	1	0	0
8678	BECN1	1	0	0
8717	TRADD	1	0	0
8737	RIPK1	1	0	0
8744	TNFSF9	1	0	0
8767	RIPK2	1	0	0
8819	SAP30	1	0	0
8833	GMPS	1	0	0
8848	TSC22D1	1	0	0
8926	SNURF	1	0	0
8939	FUBP3	1	0	0
8969	HIST1H2AG	1	0	0
8970	HIST1H2BJ	1	0	0
8976	WASL	1	0	0
9045	RPL14	1	0	0
9047	SH2D2A	1	0	0
9051	PSTPIP1	1	0	0
9140	ATG12	1	0	0
9146	HGS	1	0	0
9181	ARHGEF2	1	0	0
9184	BUB3	1	0	0
9218	VAPA	1	0	0
9219	MTA2	1	0	0
9235	IL32	1	0	0
9252	RPS6KA5	1	0	0
9282	MED14	1	0	0
9318	COPS2	1	0	0
9322	TRIP10	1	0	0
9343	EFTUD2	1	0	0
9361	LONP1	1	0	0
9392	TGFBRAP1	1	0	0
9402	GRAP2	1	0	0
9456	HOMER1	1	0	0
9463	PICK1	1	0	0
9466	IL27RA	1	0	0
9513	FXR2	1	0	0
9612	NCOR2	1	0	0
9616	RNF7	1	0	0
9620	CELSR1	1	0	0
9628	RGS6	1	0	0
9659	PDE4DIP	1	0	0
9672	SDC3	1	0	0
9698	PUM1	1	0	0
9702	CEP57	1	0	0
9733	SART3	1	0	0
9747	FAM115A	1	0	0
9775	EIF4A3	1	0	0
9781	RNF144A	1	0	0
9818	NUPL1	1	0	0
9832	JAKMIP2	1	0	0
9908	G3BP2	1	0	0
9922	IQSEC1	1	0	0
9960	USP3	1	0	0
9971	NR1H4	1	0	0
9978	RBX1	1	0	0
9987	HNRPDL	1	0	0
10013	HDAC6	1	0	0
10015	PDCD6IP	1	0	0
10127	ZNF263	1	0	0
10134	BCAP31	1	0	0
10153	CEBPZ	1	0	0
10210	TOPORS	1	0	0
10241	CALCOCO2	1	0	0
10313	RTN3	1	0	0
10392	NOD1	1	0	0
10400	PEMT	1	0	0
10401	PIAS3	1	0	0
10413	YAP1	1	0	0
10430	TMEM147	1	0	0
10452	TOMM40	1	0	0
10513	APPBP2	1	0	0
10563	CXCL13	1	0	0
10627	MYL12A	1	0	0
10638	SPHAR	1	0	0
10667	FARS2	1	0	0
10728	PTGES3	1	0	0
10747	MASP2	1	0	0
10787	NCKAP1	1	0	0
10788	IQGAP2	1	0	0
10797	MTHFD2	1	0	0
10811	NOXA1	1	0	0
10890	RAB10	1	0	0
10891	PPARGC1A	1	0	0
10935	PRDX3	1	0	0
10940	POP1	1	0	0
10956	OS9	1	0	0
10989	IMMT	1	0	0
11043	MID2	1	0	0
11059	WWP1	1	0	0
11060	WWP2	1	0	0
11079	RER1	1	0	0
11091	WDR5	1	0	0
11116	FGFR1OP	1	0	0
11137	PWP1	1	0	0
11161	C14orf1	1	0	0
11170	FAM107A	1	0	0
11183	MAP4K5	1	0	0
11184	MAP4K1	1	0	0
11194	ABCB8	1	0	0
11198	SUPT16H	1	0	0
11235	PDCD10	1	0	0
11325	DDX42	1	0	0
11331	PHB2	1	0	0
22821	RASA3	1	0	0
22824	HSPA4L	1	0	0
22827	PUF60	1	0	0
22861	NLRP1	1	0	0
22870	PPP6R1	1	0	0
22905	EPN2	1	0	0
22913	RALY	1	0	0
22919	MAPRE1	1	0	0
22920	KIFAP3	1	0	0
22948	CCT5	1	0	0
22983	MAST1	1	0	0
23062	GGA2	1	0	0
23094	SIPA1L3	1	0	0
23132	RAD54L2	1	0	0
23163	GGA3	1	0	0
23165	NUP205	1	0	0
23210	JMJD6	1	0	0
23215	PRRC2C	1	0	0
23223	RRP12	1	0	0
23243	ANKRD28	1	0	0
23281	MTUS2	1	0	0
23344	ESYT1	1	0	0
23352	UBR4	1	0	0
23363	OBSL1	1	0	0
23385	NCSTN	1	0	0
23462	HEY1	1	0	0
23474	ETHE1	1	0	0
23637	RABGAP1	1	0	0
25820	ARIH1	1	0	0
25828	TXN2	1	0	0
25865	PRKD2	1	0	0
25873	RPL36	1	0	0
25890	ABI3BP	1	0	0
25897	RNF19A	1	0	0
25927	CNRIP1	1	0	0
25959	KANK2	1	0	0
26010	SPATS2L	1	0	0
26034	IPCEF1	1	0	0
26064	RAI14	1	0	0
26088	GGA1	1	0	0
26147	PHF19	1	0	0
26528	DAZAP1	1	0	0
26771	SNORD102	1	0	0
26781	SNORA67	1	0	0
26959	HBP1	1	0	0
26999	CYFIP2	1	0	0
27036	SIGLEC7	1	0	0
27044	SND1	1	0	0
27185	DISC1	1	0	0
27242	TNFRSF21	1	0	0
27250	PDCD4	1	0	0
27301	APEX2	1	0	0
27341	RRP7A	1	0	0
29108	PYCARD	1	0	0
29924	EPN1	1	0	0
29978	UBQLN2	1	0	0
29997	GLTSCR2	1	0	0
30818	KCNIP3	1	0	0
51061	TXNDC11	1	0	0
51065	RPS27L	1	0	0
51096	UTP18	1	0	0
51175	TUBE1	1	0	0
51206	GP6	1	0	0
51279	C1RL	1	0	0
51320	MEX3C	1	0	0
51324	SPG21	1	0	0
51343	FZR1	1	0	0
51454	GULP1	1	0	0
51474	LIMA1	1	0	0
51535	PPHLN1	1	0	0
51592	TRIM33	1	0	0
51649	MRPS23	1	0	0
51652	CHMP3	1	0	0
53615	MBD3	1	0	0
54205	CYCS	1	0	0
54476	RNF216	1	0	0
54544	CRCT1	1	0	0
54557	SGTB	1	0	0
54606	DDX56	1	0	0
54726	OTUD4	1	0	0
54810	GIPC2	1	0	0
54882	ANKHD1	1	0	0
54888	NSUN2	1	0	0
54904	WHSC1L1	1	0	0
54955	C1orf109	1	0	0
55016	2020-03-01	1	0	0
55054	ATG16L1	1	0	0
55093	WDYHV1	1	0	0
55140	ELP3	1	0	0
55226	NAT10	1	0	0
55247	NEIL3	1	0	0
55280	CWF19L1	1	0	0
55294	FBXW7	1	0	0
55303	GIMAP4	1	0	0
55324	ABCF3	1	0	0
55361	PI4K2A	1	0	0
55363	HEMGN	1	0	0
55379	LRRC59	1	0	0
55536	CDCA7L	1	0	0
55697	VAC14	1	0	0
55755	CDK5RAP2	1	0	0
55759	WDR12	1	0	0
55970	GNG12	1	0	0
56144	PCDHA4	1	0	0
56172	ANKH	1	0	0
56259	CTNNBL1	1	0	0
56829	ZC3HAV1	1	0	0
56897	WRNIP1	1	0	0
57085	AGTRAP	1	0	0
57104	PNPLA2	1	0	0
57124	CD248	1	0	0
57381	RHOJ	1	0	0
57520	HECW2	1	0	0
58526	MID1IP1	1	0	0
59349	KLHL12	1	0	0
60626	RIC8A	1	0	0
63908	NAPB	1	0	0
64005	MYO1G	1	0	0
64145	ZFYVE20	1	0	0
64174	DPEP2	1	0	0
64210	MMS19	1	0	0
64386	MMP25	1	0	0
64750	SMURF2	1	0	0
64794	DDX31	1	0	0
64857	PLEKHG2	1	0	0
79004	CUEDC2	1	0	0
79009	DDX50	1	0	0
79026	AHNAK	1	0	0
79139	DERL1	1	0	0
79594	MUL1	1	0	0
79598	CEP97	1	0	0
79637	ARMC7	1	0	0
79843	FAM124B	1	0	0
79845	RNF122	1	0	0
79849	PDZD3	1	0	0
79999	LOC79999	1	0	0
80125	CCDC33	1	0	0
80135	RPF1	1	0	0
80155	NAA15	1	0	0
80230	RUFY1	1	0	0
80774	LIMD2	1	0	0
81542	TMX1	1	0	0
81563	C1orf21	1	0	0
81631	MAP1LC3B	1	0	0
83660	TLN2	1	0	0
83700	JAM3	1	0	0
83706	FERMT3	1	0	0
83942	TSSK1B	1	0	0
84166	NLRC5	1	0	0
84171	LOXL4	1	0	0
84376	HOOK3	1	0	0
84461	NEURL4	1	0	0
84528	RHOXF2	1	0	0
84557	MAP1LC3A	1	0	0
84617	TUBB6	1	0	0
84656	GLYR1	1	0	0
84859	LRCH3	1	0	0
84867	PTPN5	1	0	0
84894	LINGO1	1	0	0
84976	DISP1	1	0	0
85235	HIST1H2AH	1	0	0
85236	HIST1H2BK	1	0	0
90627	STARD13	1	0	0
91380	SNORD107	1	0	0
92609	TIMM50	1	0	0
114824	PNMA5	1	0	0
116113	FOXP4	1	0	0
117166	WFIKKN1	1	0	0
117246	FTSJ3	1	0	0
124535	HSF5	1	0	0
125115	KRT40	1	0	0
134553	C5orf24	1	0	0
140730	RIMS4	1	0	0
145389	SLC38A6	1	0	0
147372	CCBE1	1	0	0
147687	ZNF417	1	0	0
147700	KLC3	1	0	0
148156	ZNF558	1	0	0
161742	SPRED1	1	0	0
164127	C1orf65	1	0	0
165918	RNF168	1	0	0
170954	PPP1R18	1	0	0
257364	SNX33	1	0	0
[truncated: 26 more rows]
